# Supplementary material for: Dynamic Actin Gene Family Evolution in Primates
Source: Hindawi journal article supplement (doi:10.1155/2013/630803), 2013-01-01

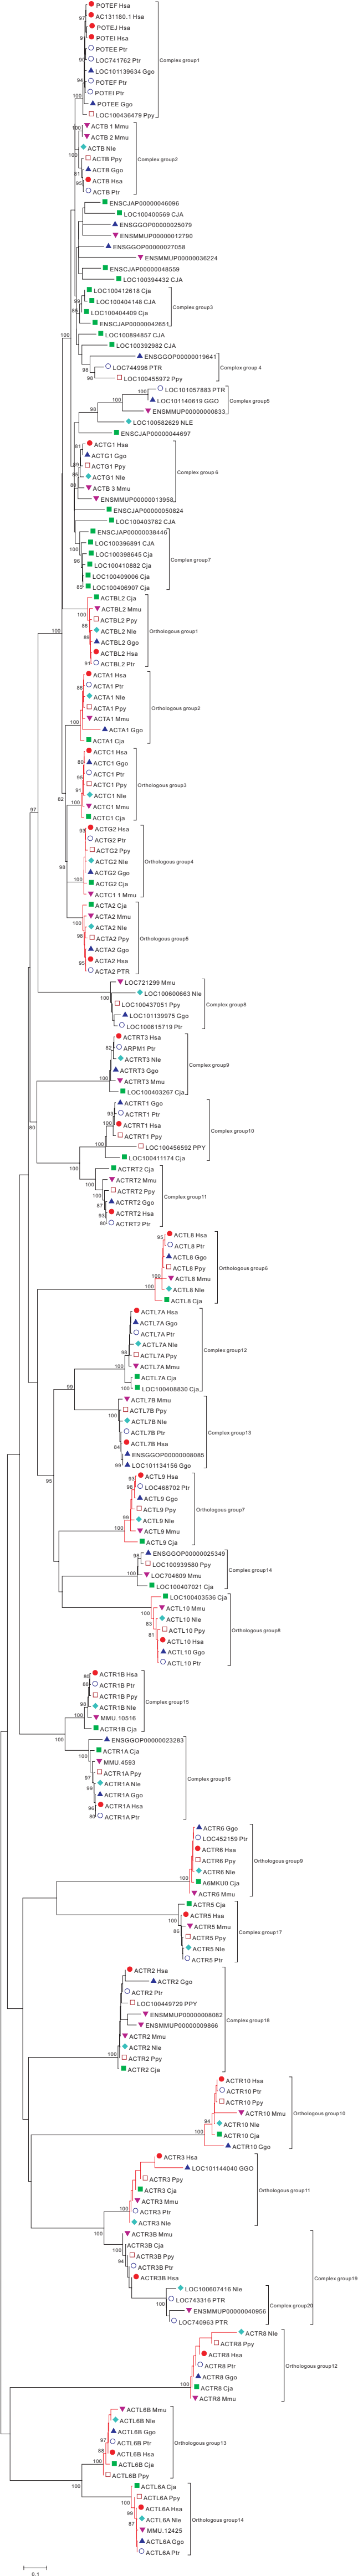

Supplement: f1 [file 630803.f1.pdf]
