# Supplementary material for: Dynamic Actin Gene Family Evolution in Primates
Source: Biomed Res Int. 2013 Jun 6;2013:630803. doi: 10.1155/2013/630803 (PMC3690210; doi:10.1155/2013/630803)
Supplement: Supplementary file 2 [file 630803.f2.xls]

## Sheet: TableS1
Supplemental table1. The number of actin genes with their CDS length in seven genomes.
Species	Number	Cds length
Homo sapiens (Human)	30	1482
Callithrix jacchus (marmoset)	44	1208
Gorilla gorilla (Gorilla)	33	1278
Macaca mulatta (Rhesus monkey)	35	1225
Nomascus leucogenys(Gibbon)	26	1156
Pan troglodytes (Chimpanzee)	34	1351
Pongo pygmaeus abelii(Orangutan)	31	1259

## Sheet: TableS2
Supplemental table2. Nucleotide diversity, nonsynonymous and synonymous substitutions of each pair of orthologs or paralogs of actin genes for actin domain within every group.
Group name	Gene name1	Gene names	PI	Ka	Ks	Ka/Ks
Complex group2	ACTB_Hsa	ACTB_Ptr	0.00543973	0	0.0227578	0
Complex group2	ACTB_Hsa	ACTB_Ggo	0.00718353	0	0.0301264	0
Complex group2	ACTB_Hsa	ACTB_Ppy	0.0153481	0	0.065679	0
Complex group2	ACTB_Hsa	ACTB_Nle	0.0185859	0.0038396	0.0664334	0.0577962
Complex group2	ACTB_Hsa	ACTB_1_Mmu	0.0245253	0	0.106971	0
Complex group2	ACTB_Hsa	ACTB_2_Mmu	0.0254493	0	0.111241	0
Complex group2	ACTB_Ptr	ACTB_Hsa	0.00543973	0	0.0227578	0
Complex group2	ACTB_Ptr	ACTB_Ggo	0.00908827	0	0.0383103	0
Complex group2	ACTB_Ptr	ACTB_Ppy	0.016439	0	0.0705942	0
Complex group2	ACTB_Ptr	ACTB_Nle	0.0198097	0.0038835	0.0717342	0.0541374
Complex group2	ACTB_Ptr	ACTB_1_Mmu	0.0219997	0	0.095493	0
Complex group2	ACTB_Ptr	ACTB_2_Mmu	0.0229306	0	0.0997484	0
Complex group2	ACTB_Ggo	ACTB_Hsa	0.00718353	0	0.0301264	0
Complex group2	ACTB_Ggo	ACTB_Ptr	0.00908827	0	0.0383103	0
Complex group2	ACTB_Ggo	ACTB_Ppy	0.0153481	0	0.0656579	0
Complex group2	ACTB_Ggo	ACTB_Nle	0.0185859	0.00384001	0.0664105	0.0578224
Complex group2	ACTB_Ggo	ACTB_1_Mmu	0.0245253	0	0.106935	0
Complex group2	ACTB_Ggo	ACTB_2_Mmu	0.0254493	0	0.111204	0
Complex group2	ACTB_Ppy	ACTB_Hsa	0.0153481	0	0.065679	0
Complex group2	ACTB_Ppy	ACTB_Ptr	0.016439	0	0.0705942	0
Complex group2	ACTB_Ppy	ACTB_Ggo	0.0153481	0	0.0656579	0
Complex group2	ACTB_Ppy	ACTB_Nle	0.0175961	0.00383714	0.0622333	0.0616574
Complex group2	ACTB_Ppy	ACTB_1_Mmu	0.0254493	0	0.111463	0
Complex group2	ACTB_Ppy	ACTB_2_Mmu	0.0263743	0	0.115767	0
Complex group2	ACTB_Nle	ACTB_Hsa	0.0185859	0.0038396	0.0664334	0.0577962
Complex group2	ACTB_Nle	ACTB_Ptr	0.0198097	0.0038835	0.0717342	0.0541374
Complex group2	ACTB_Nle	ACTB_Ggo	0.0185859	0.00384001	0.0664105	0.0578224
Complex group2	ACTB_Nle	ACTB_Ppy	0.0175961	0.00383714	0.0622333	0.0616574
Complex group2	ACTB_Nle	ACTB_1_Mmu	0.0225581	0.0038396	0.0840038	0.0457074
Complex group2	ACTB_Nle	ACTB_2_Mmu	0.0215631	0.0038396	0.0795725	0.0482529
Complex group2	ACTB_1_Mmu	ACTB_Hsa	0.0245253	0	0.106971	0
Complex group2	ACTB_1_Mmu	ACTB_Ptr	0.0219997	0	0.095493	0
Complex group2	ACTB_1_Mmu	ACTB_Ggo	0.0245253	0	0.106935	0
Complex group2	ACTB_1_Mmu	ACTB_Ppy	0.0254493	0	0.111463	0
Complex group2	ACTB_1_Mmu	ACTB_Nle	0.0225581	0.0038396	0.0840038	0.0457074
Complex group2	ACTB_1_Mmu	ACTB_2_Mmu	0.000894188	0	0.00370143	0
Complex group2	ACTB_2_Mmu	ACTB_Hsa	0.0254493	0	0.111241	0
Complex group2	ACTB_2_Mmu	ACTB_Ptr	0.0229306	0	0.0997484	0
Complex group2	ACTB_2_Mmu	ACTB_Ggo	0.0254493	0	0.111204	0
Complex group2	ACTB_2_Mmu	ACTB_Ppy	0.0263743	0	0.115767	0
Complex group2	ACTB_2_Mmu	ACTB_Nle	0.0215631	0.0038396	0.0795725	0.0482529
Complex group2	ACTB_2_Mmu	ACTB_1_Mmu	0.000894188	0	0.00370143	0
Complex group9	ACTRT3_Hsa	ARPM1_Ptr	0.00456761	0.00357002	0.00786377	0.453983
Complex group9	ACTRT3_Hsa	ACTRT3_Nle	0.0147154	0.0131779	0.0197966	0.665667
Complex group9	ACTRT3_Hsa	ACTRT3_Ggo	0.00658621	0.00571159	0.0094938	0.601613
Complex group9	ACTRT3_Hsa	ACTRT3_Mmu	0.0325734	0.0217101	0.0692957	0.313296
Complex group9	ACTRT3_Hsa	LOC100403267_Cja	0.0528188	0.0291623	0.135053	0.215932
Complex group9	ARPM1_Ptr	ACTRT3_Hsa	0.00456761	0.00357002	0.00786377	0.453983
Complex group9	ARPM1_Ptr	ACTRT3_Nle	0.0175069	0.0144019	0.0277718	0.51858
Complex group9	ARPM1_Ptr	ACTRT3_Ggo	0.00990113	0.00715484	0.0190335	0.375907
Complex group9	ARPM1_Ptr	ACTRT3_Mmu	0.0335251	0.0205079	0.0776202	0.264208
Complex group9	ARPM1_Ptr	LOC100403267_Cja	0.0557561	0.0304332	0.143849	0.211564
Complex group9	ACTRT3_Nle	ACTRT3_Hsa	0.0147154	0.0131779	0.0197966	0.665667
Complex group9	ACTRT3_Nle	ARPM1_Ptr	0.0175069	0.0144019	0.0277718	0.51858
Complex group9	ACTRT3_Nle	ACTRT3_Ggo	0.0154588	0.010036	0.0336325	0.298401
Complex group9	ACTRT3_Nle	ACTRT3_Mmu	0.0354323	0.0248082	0.0711192	0.348825
Complex group9	ACTRT3_Nle	LOC100403267_Cja	0.0537966	0.0321013	0.128327	0.250153
Complex group9	ACTRT3_Ggo	ACTRT3_Hsa	0.00658621	0.00571159	0.0094938	0.601613
Complex group9	ACTRT3_Ggo	ARPM1_Ptr	0.00990113	0.00715484	0.0190335	0.375907
Complex group9	ACTRT3_Ggo	ACTRT3_Nle	0.0154588	0.010036	0.0336325	0.298401
Complex group9	ACTRT3_Ggo	ACTRT3_Mmu	0.0323831	0.0216909	0.0686473	0.315976
Complex group9	ACTRT3_Ggo	LOC100403267_Cja	0.054384	0.0291051	0.143476	0.202858
Complex group9	ACTRT3_Mmu	ACTRT3_Hsa	0.0325734	0.0217101	0.0692957	0.313296
Complex group9	ACTRT3_Mmu	ARPM1_Ptr	0.0335251	0.0205079	0.0776202	0.264208
Complex group9	ACTRT3_Mmu	ACTRT3_Nle	0.0354323	0.0248082	0.0711192	0.348825
Complex group9	ACTRT3_Mmu	ACTRT3_Ggo	0.0323831	0.0216909	0.0686473	0.315976
Complex group9	ACTRT3_Mmu	LOC100403267_Cja	0.0666259	0.0356785	0.175526	0.203266
Complex group9	LOC100403267_Cja	ACTRT3_Hsa	0.0528188	0.0291623	0.135053	0.215932
Complex group9	LOC100403267_Cja	ARPM1_Ptr	0.0557561	0.0304332	0.143849	0.211564
Complex group9	LOC100403267_Cja	ACTRT3_Nle	0.0537966	0.0321013	0.128327	0.250153
Complex group9	LOC100403267_Cja	ACTRT3_Ggo	0.054384	0.0291051	0.143476	0.202858
Complex group9	LOC100403267_Cja	ACTRT3_Mmu	0.0666259	0.0356785	0.175526	0.203266
Complex group11	ACTRT2_Hsa	ACTRT2_Ptr	0.00722245	0.00475814	0.0149818	0.317596
Complex group11	ACTRT2_Hsa	ACTRT2_Ppy	0.0311876	0.0143875	0.0859476	0.167398
Complex group11	ACTRT2_Hsa	ACTRT2_Mmu	0.0425121	0.0211027	0.112861	0.18698
Complex group11	ACTRT2_Hsa	ACTRT2_Ggo	0.011772	0.00715569	0.026335	0.271718
Complex group11	ACTRT2_Hsa	ACTRT2_Cja	0.112149	0.0679837	0.267253	0.254379
Complex group11	ACTRT2_Ptr	ACTRT2_Hsa	0.00722245	0.00475814	0.0149818	0.317596
Complex group11	ACTRT2_Ptr	ACTRT2_Ppy	0.0293167	0.0143875	0.0777142	0.185133
Complex group11	ACTRT2_Ptr	ACTRT2_Mmu	0.0406128	0.0211027	0.104362	0.202206
Complex group11	ACTRT2_Ptr	ACTRT2_Ggo	0.00994889	0.00715569	0.0187159	0.382332
Complex group11	ACTRT2_Ptr	ACTRT2_Cja	0.113201	0.0679837	0.27255	0.249436
Complex group11	ACTRT2_Ppy	ACTRT2_Hsa	0.0311876	0.0143875	0.0859476	0.167398
Complex group11	ACTRT2_Ppy	ACTRT2_Ptr	0.0293167	0.0143875	0.0777142	0.185133
Complex group11	ACTRT2_Ppy	ACTRT2_Mmu	0.0406128	0.016251	0.120854	0.134468
Complex group11	ACTRT2_Ppy	ACTRT2_Ggo	0.0274505	0.0119823	0.0774632	0.154684
Complex group11	ACTRT2_Ppy	ACTRT2_Cja	0.111098	0.0628454	0.281675	0.223113
Complex group11	ACTRT2_Mmu	ACTRT2_Hsa	0.0425121	0.0211027	0.112861	0.18698
Complex group11	ACTRT2_Mmu	ACTRT2_Ptr	0.0406128	0.0211027	0.104362	0.202206
Complex group11	ACTRT2_Mmu	ACTRT2_Ppy	0.0406128	0.016251	0.120854	0.134468
Complex group11	ACTRT2_Mmu	ACTRT2_Ggo	0.0377728	0.0186794	0.0998214	0.187128
Complex group11	ACTRT2_Mmu	ACTRT2_Cja	0.107953	0.0662094	0.251591	0.263163
Complex group11	ACTRT2_Ggo	ACTRT2_Hsa	0.011772	0.00715569	0.026335	0.271718
Complex group11	ACTRT2_Ggo	ACTRT2_Ptr	0.00994889	0.00715569	0.0187159	0.382332
Complex group11	ACTRT2_Ggo	ACTRT2_Ppy	0.0274505	0.0119823	0.0774632	0.154684
Complex group11	ACTRT2_Ggo	ACTRT2_Mmu	0.0377728	0.0186794	0.0998214	0.187128
Complex group11	ACTRT2_Ggo	ACTRT2_Cja	0.109	0.0654292	0.261032	0.250656
Complex group11	ACTRT2_Cja	ACTRT2_Hsa	0.112149	0.0679837	0.267253	0.254379
Complex group11	ACTRT2_Cja	ACTRT2_Ptr	0.113201	0.0679837	0.27255	0.249436
Complex group11	ACTRT2_Cja	ACTRT2_Ppy	0.111098	0.0628454	0.281675	0.223113
Complex group11	ACTRT2_Cja	ACTRT2_Mmu	0.107953	0.0662094	0.251591	0.263163
Complex group11	ACTRT2_Cja	ACTRT2_Ggo	0.109	0.0654292	0.261032	0.250656
Complex group10	LOC100456592_PPY	LOC100411174_Cja	0.216289	0.168453	0.35468	0.474944
Complex group10	LOC100456592_PPY	ACTRT1_Ppy	0.171741	0.130793	0.285675	0.45784
Complex group10	LOC100456592_PPY	ACTRT1_Ptr	0.175247	0.128066	0.314256	0.40752
Complex group10	LOC100456592_PPY	ACTRT1_Hsa	0.176389	0.128038	0.320453	0.399554
Complex group10	LOC100456592_PPY	ACTRT1_Ggo	0.174107	0.128038	0.308613	0.414883
Complex group10	LOC100411174_Cja	LOC100456592_PPY	0.216289	0.168453	0.35468	0.474944
Complex group10	LOC100411174_Cja	ACTRT1_Ppy	0.103781	0.0892705	0.151338	0.589876
Complex group10	LOC100411174_Cja	ACTRT1_Ptr	0.107326	0.0921519	0.157057	0.58674
Complex group10	LOC100411174_Cja	ACTRT1_Hsa	0.103179	0.0854748	0.161613	0.528885
Complex group10	LOC100411174_Cja	ACTRT1_Ggo	0.0990554	0.0861408	0.141087	0.61055
Complex group10	ACTRT1_Ppy	LOC100456592_PPY	0.171741	0.130793	0.285675	0.45784
Complex group10	ACTRT1_Ppy	LOC100411174_Cja	0.103781	0.0892705	0.151338	0.589876
Complex group10	ACTRT1_Ppy	ACTRT1_Ptr	0.0239284	0.0204791	0.0350941	0.583548
Complex group10	ACTRT1_Ppy	ACTRT1_Hsa	0.0201971	0.014399	0.0390841	0.368411
Complex group10	ACTRT1_Ppy	ACTRT1_Ggo	0.0183383	0.014399	0.0311026	0.462952
Complex group10	ACTRT1_Ptr	LOC100456592_PPY	0.175247	0.128066	0.314256	0.40752
Complex group10	ACTRT1_Ptr	LOC100411174_Cja	0.107326	0.0921519	0.157057	0.58674
Complex group10	ACTRT1_Ptr	ACTRT1_Ppy	0.0239284	0.0204791	0.0350941	0.583548
Complex group10	ACTRT1_Ptr	ACTRT1_Hsa	0.00906355	0.00593651	0.019152	0.309968
Complex group10	ACTRT1_Ptr	ACTRT1_Ggo	0.0108895	0.00832433	0.019152	0.434645
Complex group10	ACTRT1_Hsa	LOC100456592_PPY	0.176389	0.128038	0.320453	0.399554
Complex group10	ACTRT1_Hsa	LOC100411174_Cja	0.103179	0.0854748	0.161613	0.528885
Complex group10	ACTRT1_Hsa	ACTRT1_Ppy	0.0201971	0.014399	0.0390841	0.368411
Complex group10	ACTRT1_Hsa	ACTRT1_Ptr	0.00906355	0.00593651	0.019152	0.309968
Complex group10	ACTRT1_Hsa	ACTRT1_Ggo	0.00724206	0.0023692	0.0230344	0.102855
Complex group10	ACTRT1_Ggo	LOC100456592_PPY	0.174107	0.128038	0.308613	0.414883
Complex group10	ACTRT1_Ggo	LOC100411174_Cja	0.0990554	0.0861408	0.141087	0.61055
Complex group10	ACTRT1_Ggo	ACTRT1_Ppy	0.0183383	0.014399	0.0311026	0.462952
Complex group10	ACTRT1_Ggo	ACTRT1_Ptr	0.0108895	0.00832433	0.019152	0.434645
Complex group10	ACTRT1_Ggo	ACTRT1_Hsa	0.00724206	0.0023692	0.0230344	0.102855
Complex group15	ACTR1B_Hsa	ACTR1B_Ptr	0.00728161	0	0.0297621	0
Complex group15	ACTR1B_Hsa	ACTR1B_Ppy	0.0127896	0	0.0528853	0
Complex group15	ACTR1B_Hsa	ACTR1B_Nle	0.0206521	0.00123355	0.082544	0.0149442
Complex group15	ACTR1B_Hsa	MMU.10516	0.0295605	0.00241497	0.118122	0.0204448
Complex group15	ACTR1B_Hsa	ACTR1B_Cja	0.0583732	0.00362064	0.25446	0.0142287
Complex group15	ACTR1B_Ptr	ACTR1B_Hsa	0.00728161	0	0.0297621	0
Complex group15	ACTR1B_Ptr	ACTR1B_Ppy	0.00911311	0	0.0373909	0
Complex group15	ACTR1B_Ptr	ACTR1B_Nle	0.0206521	0.00123355	0.082544	0.0149442
Complex group15	ACTR1B_Ptr	MMU.10516	0.0286189	0.00241497	0.113869	0.0212083
Complex group15	ACTR1B_Ptr	ACTR1B_Cja	0.0583732	0.00362064	0.25446	0.0142287
Complex group15	ACTR1B_Ppy	ACTR1B_Hsa	0.0127896	0	0.0528853	0
Complex group15	ACTR1B_Ppy	ACTR1B_Ptr	0.00911311	0	0.0373909	0
Complex group15	ACTR1B_Ppy	ACTR1B_Nle	0.0168546	0.00123355	0.0661049	0.0186605
Complex group15	ACTR1B_Ppy	MMU.10516	0.0267392	0.00241497	0.105436	0.0229046
Complex group15	ACTR1B_Ppy	ACTR1B_Cja	0.0564176	0.00362064	0.24426	0.0148229
Complex group15	ACTR1B_Nle	ACTR1B_Hsa	0.0206521	0.00123355	0.082544	0.0149442
Complex group15	ACTR1B_Nle	ACTR1B_Ptr	0.0206521	0.00123355	0.082544	0.0149442
Complex group15	ACTR1B_Nle	ACTR1B_Ppy	0.0168546	0.00123355	0.0661049	0.0186605
Complex group15	ACTR1B_Nle	MMU.10516	0.0302308	0.00370829	0.116388	0.0318615
Complex group15	ACTR1B_Nle	ACTR1B_Cja	0.0557234	0.00556188	0.232192	0.0239538
Complex group15	MMU.10516	ACTR1B_Hsa	0.0295605	0.00241497	0.118122	0.0204448
Complex group15	MMU.10516	ACTR1B_Ptr	0.0286189	0.00241497	0.113869	0.0212083
Complex group15	MMU.10516	ACTR1B_Ppy	0.0267392	0.00241497	0.105436	0.0229046
Complex group15	MMU.10516	ACTR1B_Nle	0.0302308	0.00370829	0.116388	0.0318615
Complex group15	MMU.10516	ACTR1B_Cja	0.0632848	0.00120542	0.29086	0.00414434
Complex group15	ACTR1B_Cja	ACTR1B_Hsa	0.0583732	0.00362064	0.25446	0.0142287
Complex group15	ACTR1B_Cja	ACTR1B_Ptr	0.0583732	0.00362064	0.25446	0.0142287
Complex group15	ACTR1B_Cja	ACTR1B_Ppy	0.0564176	0.00362064	0.24426	0.0148229
Complex group15	ACTR1B_Cja	ACTR1B_Nle	0.0557234	0.00556188	0.232192	0.0239538
Complex group15	ACTR1B_Cja	MMU.10516	0.0632848	0.00120542	0.29086	0.00414434
Complex group16	ENSGGOP00000023283	ACTR1A_Cja	0.0821489	0.0638263	0.143821	0.443788
Complex group16	ENSGGOP00000023283	MMU.4593	0.0810779	0.0637843	0.139267	0.457999
Complex group16	ENSGGOP00000023283	ACTR1A_Nle	0.0886075	0.0630983	0.176619	0.357256
Complex group16	ENSGGOP00000023283	ACTR1A_Ppy	0.0886075	0.0630983	0.176619	0.357256
Complex group16	ENSGGOP00000023283	ACTR1A_Ggo	0.0886075	0.0630706	0.176888	0.356558
Complex group16	ENSGGOP00000023283	ACTR1A_Hsa	0.0896894	0.0630706	0.18202	0.346503
Complex group16	ENSGGOP00000023283	ACTR1A_Ptr	0.0896894	0.0630775	0.181951	0.346673
Complex group16	ACTR1A_Cja	ENSGGOP00000023283	0.0821489	0.0638263	0.143821	0.443788
Complex group16	ACTR1A_Cja	MMU.4593	0.0342864	0	0.150965	0
Complex group16	ACTR1A_Cja	ACTR1A_Nle	0.0409531	0	0.18329	0
Complex group16	ACTR1A_Cja	ACTR1A_Ppy	0.0438285	0	0.197582	0
Complex group16	ACTR1A_Cja	ACTR1A_Ggo	0.0409531	0	0.183546	0
Complex group16	ACTR1A_Cja	ACTR1A_Hsa	0.0419103	0	0.188288	0
Complex group16	ACTR1A_Cja	ACTR1A_Ptr	0.0419103	0	0.188222	0
Complex group16	MMU.4593	ENSGGOP00000023283	0.0810779	0.0637843	0.139267	0.457999
Complex group16	MMU.4593	ACTR1A_Cja	0.0342864	0	0.150965	0
Complex group16	MMU.4593	ACTR1A_Nle	0.0239284	0	0.102996	0
Complex group16	MMU.4593	ACTR1A_Ppy	0.0229938	0	0.0987618	0
Complex group16	MMU.4593	ACTR1A_Ggo	0.0201971	0	0.0863133	0
Complex group16	MMU.4593	ACTR1A_Hsa	0.0229938	0	0.0988922	0
Complex group16	MMU.4593	ACTR1A_Ptr	0.0229938	0	0.0988596	0
Complex group16	ACTR1A_Nle	ENSGGOP00000023283	0.0886075	0.0630983	0.176619	0.357256
Complex group16	ACTR1A_Nle	ACTR1A_Cja	0.0409531	0	0.18329	0
Complex group16	ACTR1A_Nle	MMU.4593	0.0239284	0	0.102996	0
Complex group16	ACTR1A_Nle	ACTR1A_Ppy	0.0146346	0	0.0616918	0
Complex group16	ACTR1A_Nle	ACTR1A_Ggo	0.0127896	0	0.0537658	0
Complex group16	ACTR1A_Nle	ACTR1A_Hsa	0.0137115	0	0.0577578	0
Complex group16	ACTR1A_Nle	ACTR1A_Ptr	0.0137115	0	0.0577393	0
Complex group16	ACTR1A_Ppy	ENSGGOP00000023283	0.0886075	0.0630983	0.176619	0.357256
Complex group16	ACTR1A_Ppy	ACTR1A_Cja	0.0438285	0	0.197582	0
Complex group16	ACTR1A_Ppy	MMU.4593	0.0229938	0	0.0987618	0
Complex group16	ACTR1A_Ppy	ACTR1A_Nle	0.0146346	0	0.0616918	0
Complex group16	ACTR1A_Ppy	ACTR1A_Ggo	0.0100305	0	0.0419157	0
Complex group16	ACTR1A_Ppy	ACTR1A_Hsa	0.0109491	0	0.045845	0
Complex group16	ACTR1A_Ppy	ACTR1A_Ptr	0.0109491	0	0.0458304	0
Complex group16	ACTR1A_Ggo	ENSGGOP00000023283	0.0886075	0.0630706	0.176888	0.356558
Complex group16	ACTR1A_Ggo	ACTR1A_Cja	0.0409531	0	0.183546	0
Complex group16	ACTR1A_Ggo	MMU.4593	0.0201971	0	0.0863133	0
Complex group16	ACTR1A_Ggo	ACTR1A_Nle	0.0127896	0	0.0537658	0
Complex group16	ACTR1A_Ggo	ACTR1A_Ppy	0.0100305	0	0.0419157	0
Complex group16	ACTR1A_Ggo	ACTR1A_Hsa	0.00454272	0	0.0187862	0
Complex group16	ACTR1A_Ggo	ACTR1A_Ptr	0.00454272	0	0.0187803	0
Complex group16	ACTR1A_Hsa	ENSGGOP00000023283	0.0896894	0.0630706	0.18202	0.346503
Complex group16	ACTR1A_Hsa	ACTR1A_Cja	0.0419103	0	0.188288	0
Complex group16	ACTR1A_Hsa	MMU.4593	0.0229938	0	0.0988922	0
Complex group16	ACTR1A_Hsa	ACTR1A_Nle	0.0137115	0	0.0577578	0
Complex group16	ACTR1A_Hsa	ACTR1A_Ppy	0.0109491	0	0.045845	0
Complex group16	ACTR1A_Hsa	ACTR1A_Ggo	0.00454272	0	0.0187862	0
Complex group16	ACTR1A_Hsa	ACTR1A_Ptr	0.00363197	0	0.0149864	0
Complex group16	ACTR1A_Ptr	ENSGGOP00000023283	0.0896894	0.0630775	0.181951	0.346673
Complex group16	ACTR1A_Ptr	ACTR1A_Cja	0.0419103	0	0.188222	0
Complex group16	ACTR1A_Ptr	MMU.4593	0.0229938	0	0.0988596	0
Complex group16	ACTR1A_Ptr	ACTR1A_Nle	0.0137115	0	0.0577393	0
Complex group16	ACTR1A_Ptr	ACTR1A_Ppy	0.0109491	0	0.0458304	0
Complex group16	ACTR1A_Ptr	ACTR1A_Ggo	0.00454272	0	0.0187803	0
Complex group16	ACTR1A_Ptr	ACTR1A_Hsa	0.00363197	0	0.0149864	0
Complex group12	ACTL7A_Hsa	ACTL7A_Ptr	0.00821926	0.00359246	0.0230861	0.155611
Complex group12	ACTL7A_Hsa	ACTL7A_Nle	0.0211865	0.00721448	0.0669736	0.107721
Complex group12	ACTL7A_Hsa	ACTL7A_Ppy	0.0156017	0.00239689	0.058796	0.0407661
Complex group12	ACTL7A_Hsa	ACTL7A_Mmu	0.0193203	0.00239378	0.0756107	0.0316593
Complex group12	ACTL7A_Hsa	ACTL7A_Cja	0.0605052	0.0181241	0.213865	0.0847455
Complex group12	ACTL7A_Hsa	ACTL7A_Ggo	0.00730155	0.00359139	0.0192072	0.186981
Complex group12	ACTL7A_Hsa	LOC100408830_Cja	0.0644539	0.0217823	0.219659	0.0991641
Complex group12	ACTL7A_Ptr	ACTL7A_Hsa	0.00821926	0.00359246	0.0230861	0.155611
Complex group12	ACTL7A_Ptr	ACTL7A_Nle	0.0268133	0.00842114	0.0879542	0.0957446
Complex group12	ACTL7A_Ptr	ACTL7A_Ppy	0.0202528	0.00359713	0.0753606	0.0477322
Complex group12	ACTL7A_Ptr	ACTL7A_Mmu	0.0239947	0.00359246	0.0926419	0.0387779
Complex group12	ACTL7A_Ptr	ACTL7A_Cja	0.0644539	0.0193423	0.229427	0.084307
Complex group12	ACTL7A_Ptr	ACTL7A_Ggo	0.0119014	0.00479091	0.0349691	0.137004
Complex group12	ACTL7A_Ptr	LOC100408830_Cja	0.0684235	0.0230042	0.235394	0.0977266
Complex group12	ACTL7A_Nle	ACTL7A_Hsa	0.0211865	0.00721448	0.0669736	0.107721
Complex group12	ACTL7A_Nle	ACTL7A_Ptr	0.0268133	0.00842114	0.0879542	0.0957446
Complex group12	ACTL7A_Nle	ACTL7A_Ppy	0.024933	0.00722389	0.0832812	0.086741
Complex group12	ACTL7A_Nle	ACTL7A_Mmu	0.0305881	0.00721448	0.109358	0.0659714
Complex group12	ACTL7A_Nle	ACTL7A_Cja	0.0694192	0.0230647	0.238309	0.0967851
Complex group12	ACTL7A_Nle	ACTL7A_Ggo	0.0277552	0.0108414	0.083808	0.12936
Complex group12	ACTL7A_Nle	LOC100408830_Cja	0.0734152	0.0267478	0.24434	0.10947
Complex group12	ACTL7A_Ppy	ACTL7A_Hsa	0.0156017	0.00239689	0.058796	0.0407661
Complex group12	ACTL7A_Ppy	ACTL7A_Ptr	0.0202528	0.00359713	0.0753606	0.0477322
Complex group12	ACTL7A_Ppy	ACTL7A_Nle	0.024933	0.00722389	0.0832812	0.086741
Complex group12	ACTL7A_Ppy	ACTL7A_Mmu	0.0239947	0.00239689	0.0964215	0.0248584
Complex group12	ACTL7A_Ppy	ACTL7A_Cja	0.0575573	0.0181479	0.197932	0.0916873
Complex group12	ACTL7A_Ppy	ACTL7A_Ggo	0.0211865	0.00600303	0.0712702	0.0842292
Complex group12	ACTL7A_Ppy	LOC100408830_Cja	0.0614905	0.0218109	0.203536	0.10716
Complex group12	ACTL7A_Mmu	ACTL7A_Hsa	0.0193203	0.00239378	0.0756107	0.0316593
Complex group12	ACTL7A_Mmu	ACTL7A_Ptr	0.0239947	0.00359246	0.0926419	0.0387779
Complex group12	ACTL7A_Mmu	ACTL7A_Nle	0.0305881	0.00721448	0.109358	0.0659714
Complex group12	ACTL7A_Mmu	ACTL7A_Ppy	0.0239947	0.00239689	0.0964215	0.0248584
Complex group12	ACTL7A_Mmu	ACTL7A_Cja	0.0634648	0.0187359	0.226599	0.0826829
Complex group12	ACTL7A_Mmu	ACTL7A_Ggo	0.0211865	0.00599524	0.0715775	0.0837587
Complex group12	ACTL7A_Mmu	LOC100408830_Cja	0.0674291	0.0223965	0.23253	0.0963167
Complex group12	ACTL7A_Cja	ACTL7A_Hsa	0.0605052	0.0181241	0.213865	0.0847455
Complex group12	ACTL7A_Cja	ACTL7A_Ptr	0.0644539	0.0193423	0.229427	0.084307
Complex group12	ACTL7A_Cja	ACTL7A_Nle	0.0694192	0.0230647	0.238309	0.0967851
Complex group12	ACTL7A_Cja	ACTL7A_Ppy	0.0575573	0.0181479	0.197932	0.0916873
Complex group12	ACTL7A_Cja	ACTL7A_Mmu	0.0634648	0.0187359	0.226599	0.0826829
Complex group12	ACTL7A_Cja	ACTL7A_Ggo	0.062477	0.0193364	0.219417	0.0881265
Complex group12	ACTL7A_Cja	LOC100408830_Cja	0.0137492	0.0108013	0.0232802	0.463967
Complex group12	ACTL7A_Ggo	ACTL7A_Hsa	0.00730155	0.00359139	0.0192072	0.186981
Complex group12	ACTL7A_Ggo	ACTL7A_Ptr	0.0119014	0.00479091	0.0349691	0.137004
Complex group12	ACTL7A_Ggo	ACTL7A_Nle	0.0277552	0.0108414	0.083808	0.12936
Complex group12	ACTL7A_Ggo	ACTL7A_Ppy	0.0211865	0.00600303	0.0712702	0.0842292
Complex group12	ACTL7A_Ggo	ACTL7A_Mmu	0.0211865	0.00599524	0.0715775	0.0837587
Complex group12	ACTL7A_Ggo	ACTL7A_Cja	0.062477	0.0193364	0.219417	0.0881265
Complex group12	ACTL7A_Ggo	LOC100408830_Cja	0.0664361	0.0229973	0.225281	0.102082
Complex group12	LOC100408830_Cja	ACTL7A_Hsa	0.0644539	0.0217823	0.219659	0.0991641
Complex group12	LOC100408830_Cja	ACTL7A_Ptr	0.0684235	0.0230042	0.235394	0.0977266
Complex group12	LOC100408830_Cja	ACTL7A_Nle	0.0734152	0.0267478	0.24434	0.10947
Complex group12	LOC100408830_Cja	ACTL7A_Ppy	0.0614905	0.0218109	0.203536	0.10716
Complex group12	LOC100408830_Cja	ACTL7A_Mmu	0.0674291	0.0223965	0.23253	0.0963167
Complex group12	LOC100408830_Cja	ACTL7A_Cja	0.0137492	0.0108013	0.0232802	0.463967
Complex group12	LOC100408830_Cja	ACTL7A_Ggo	0.0664361	0.0229973	0.225281	0.102082
Complex group13	ACTL7B_Hsa	ACTL7B_Ptr	0.0100581	0.0048358	0.0262691	0.184087
Complex group13	ACTL7B_Hsa	ACTL7B_Nle	0.024933	0.00847638	0.0778404	0.108894
Complex group13	ACTL7B_Hsa	ACTL7B_Ppy	0.0193203	0.00604476	0.0616126	0.0981093
Complex group13	ACTL7B_Hsa	ACTL7B_Mmu	0.0334317	0.00604842	0.124117	0.0487315
Complex group13	ACTL7B_Hsa	ENSGGOP00000008085	0.0119014	0.00848151	0.0224736	0.377399
Complex group13	ACTL7B_Hsa	LOC101134156_Ggo	0.0119014	0.00848151	0.0224736	0.377399
Complex group13	ACTL7B_Ptr	ACTL7B_Hsa	0.0100581	0.0048358	0.0262691	0.184087
Complex group13	ACTL7B_Ptr	ACTL7B_Nle	0.0277552	0.0109203	0.0818462	0.133425
Complex group13	ACTL7B_Ptr	ACTL7B_Ppy	0.0211865	0.0084798	0.0615335	0.137808
Complex group13	ACTL7B_Ptr	ACTL7B_Mmu	0.0362861	0.00848494	0.128312	0.0661274
Complex group13	ACTL7B_Ptr	ENSGGOP00000008085	0.0146749	0.0109269	0.0262527	0.416222
Complex group13	ACTL7B_Ptr	LOC101134156_Ggo	0.0146749	0.0109269	0.0262527	0.416222
Complex group13	ACTL7B_Nle	ACTL7B_Hsa	0.024933	0.00847638	0.0778404	0.108894
Complex group13	ACTL7B_Nle	ACTL7B_Ptr	0.0277552	0.0109203	0.0818462	0.133425
Complex group13	ACTL7B_Nle	ACTL7B_Ppy	0.0202528	0.00725666	0.0616918	0.117628
Complex group13	ACTL7B_Nle	ACTL7B_Mmu	0.0324827	0.00726105	0.115613	0.0628048
Complex group13	ACTL7B_Nle	ENSGGOP00000008085	0.0202528	0.0096971	0.0535942	0.180936
Complex group13	ACTL7B_Nle	LOC101134156_Ggo	0.0202528	0.0096971	0.0535942	0.180936
Complex group13	ACTL7B_Ppy	ACTL7B_Hsa	0.0193203	0.00604476	0.0616126	0.0981093
Complex group13	ACTL7B_Ppy	ACTL7B_Ptr	0.0211865	0.0084798	0.0615335	0.137808
Complex group13	ACTL7B_Ppy	ACTL7B_Nle	0.0202528	0.00725666	0.0616918	0.117628
Complex group13	ACTL7B_Ppy	ACTL7B_Mmu	0.0268133	0.00483288	0.0985668	0.0490315
Complex group13	ACTL7B_Ppy	ENSGGOP00000008085	0.0202528	0.0096971	0.0535942	0.180936
Complex group13	ACTL7B_Ppy	LOC101134156_Ggo	0.0202528	0.0096971	0.0535942	0.180936
Complex group13	ACTL7B_Mmu	ACTL7B_Hsa	0.0334317	0.00604842	0.124117	0.0487315
Complex group13	ACTL7B_Mmu	ACTL7B_Ptr	0.0362861	0.00848494	0.128312	0.0661274
Complex group13	ACTL7B_Mmu	ACTL7B_Nle	0.0324827	0.00726105	0.115613	0.0628048
Complex group13	ACTL7B_Mmu	ACTL7B_Ppy	0.0268133	0.00483288	0.0985668	0.0490315
Complex group13	ACTL7B_Mmu	ENSGGOP00000008085	0.034382	0.00970299	0.115383	0.084094
Complex group13	ACTL7B_Mmu	LOC101134156_Ggo	0.034382	0.00970299	0.115383	0.084094
Complex group13	ENSGGOP00000008085	ACTL7B_Hsa	0.0119014	0.00848151	0.0224736	0.377399
Complex group13	ENSGGOP00000008085	ACTL7B_Ptr	0.0146749	0.0109269	0.0262527	0.416222
Complex group13	ENSGGOP00000008085	ACTL7B_Nle	0.0202528	0.0096971	0.0535942	0.180936
Complex group13	ENSGGOP00000008085	ACTL7B_Ppy	0.0202528	0.0096971	0.0535942	0.180936
Complex group13	ENSGGOP00000008085	ACTL7B_Mmu	0.034382	0.00970299	0.115383	0.084094
Complex group13	ENSGGOP00000008085	LOC101134156_Ggo	0	0	0	0
Complex group13	LOC101134156_Ggo	ACTL7B_Hsa	0.0119014	0.00848151	0.0224736	0.377399
Complex group13	LOC101134156_Ggo	ACTL7B_Ptr	0.0146749	0.0109269	0.0262527	0.416222
Complex group13	LOC101134156_Ggo	ACTL7B_Nle	0.0202528	0.0096971	0.0535942	0.180936
Complex group13	LOC101134156_Ggo	ACTL7B_Ppy	0.0202528	0.0096971	0.0535942	0.180936
Complex group13	LOC101134156_Ggo	ACTL7B_Mmu	0.034382	0.00970299	0.115383	0.084094
Complex group13	LOC101134156_Ggo	ENSGGOP00000008085	0	0	0	0
Complex group14	ENSGGOP00000025349	LOC704609_Mmu	0.0459531	0.0307976	0.0905126	0.340258
Complex group14	ENSGGOP00000025349	LOC100407021_Cja	0.0710951	0.0578584	0.110014	0.525919
Complex group14	ENSGGOP00000025349	LOC100939580_Ppy	0.0216267	0.0185994	0.0302403	0.615054
Complex group14	LOC704609_Mmu	ENSGGOP00000025349	0.0459531	0.0307976	0.0905126	0.340258
Complex group14	LOC704609_Mmu	LOC100407021_Cja	0.0696064	0.0498836	0.128312	0.388768
Complex group14	LOC704609_Mmu	LOC100939580_Ppy	0.0390968	0.0222335	0.0890219	0.249754
Complex group14	LOC100407021_Cja	ENSGGOP00000025349	0.0710951	0.0578584	0.110014	0.525919
Complex group14	LOC100407021_Cja	LOC704609_Mmu	0.0696064	0.0498836	0.128312	0.388768
Complex group14	LOC100407021_Cja	LOC100939580_Ppy	0.0622431	0.046417	0.108815	0.426569
Complex group14	LOC100939580_Ppy	ENSGGOP00000025349	0.0216267	0.0185994	0.0302403	0.615054
Complex group14	LOC100939580_Ppy	LOC704609_Mmu	0.0390968	0.0222335	0.0890219	0.249754
Complex group14	LOC100939580_Ppy	LOC100407021_Cja	0.0622431	0.046417	0.108815	0.426569
Complex group18	ACTR2_Hsa	ACTR2_Ptr	0.00172018	0	0.00733502	0
Complex group18	ACTR2_Hsa	ACTR2_Nle	0.0165033	0.0117168	0.0321765	0.364141
Complex group18	ACTR2_Hsa	ACTR2_Ppy	0.0052402	0	0.0223342	0
Complex group18	ACTR2_Hsa	ACTR2_Mmu	0.0156256	0.0103886	0.0327685	0.317032
Complex group18	ACTR2_Hsa	ACTR2_Cja	0.0176116	0	0.0772137	0
Complex group18	ACTR2_Hsa	ACTR2_Ggo	0.0837009	0.0777271	0.103396	0.75174
Complex group18	ACTR2_Hsa	LOC100449729_PPY	0.0374743	0.034315	0.0478784	0.716711
Complex group18	ACTR2_Hsa	ENSMMUP00000008082	0.0993982	0.0949016	0.114342	0.829981
Complex group18	ACTR2_Hsa	ENSMMUP00000009866	0.0625752	0.0593279	0.07306	0.812043
Complex group18	ACTR2_Ptr	ACTR2_Hsa	0.00172018	0	0.00733502	0
Complex group18	ACTR2_Ptr	ACTR2_Nle	0.0165033	0.0117168	0.0321765	0.364141
Complex group18	ACTR2_Ptr	ACTR2_Ppy	0.0052402	0	0.0223342	0
Complex group18	ACTR2_Ptr	ACTR2_Mmu	0.0156256	0.0103886	0.0327685	0.317032
Complex group18	ACTR2_Ptr	ACTR2_Cja	0.0193957	0	0.085391	0
Complex group18	ACTR2_Ptr	ACTR2_Ggo	0.0837009	0.0777271	0.103396	0.75174
Complex group18	ACTR2_Ptr	LOC100449729_PPY	0.0374743	0.034315	0.0478784	0.716711
Complex group18	ACTR2_Ptr	ENSMMUP00000008082	0.101114	0.0949016	0.121866	0.77874
Complex group18	ACTR2_Ptr	ENSMMUP00000009866	0.0645258	0.0593279	0.0814021	0.728825
Complex group18	ACTR2_Nle	ACTR2_Hsa	0.0165033	0.0117168	0.0321765	0.364141
Complex group18	ACTR2_Nle	ACTR2_Ptr	0.0165033	0.0117168	0.0321765	0.364141
Complex group18	ACTR2_Nle	ACTR2_Ppy	0.00787409	0	0.0337557	0
Complex group18	ACTR2_Nle	ACTR2_Mmu	0.0156256	0.0067925	0.0446782	0.152032
Complex group18	ACTR2_Nle	ACTR2_Cja	0.0202894	0	0.0895133	0
Complex group18	ACTR2_Nle	ACTR2_Ggo	0.0885821	0.0777271	0.124885	0.622389
Complex group18	ACTR2_Nle	LOC100449729_PPY	0.0420629	0.034315	0.0679197	0.505229
Complex group18	ACTR2_Nle	ENSMMUP00000008082	0.108019	0.0949016	0.152738	0.621336
Complex group18	ACTR2_Nle	ENSMMUP00000009866	0.0694245	0.0593279	0.102673	0.577836
Complex group18	ACTR2_Ppy	ACTR2_Hsa	0.0052402	0	0.0223342	0
Complex group18	ACTR2_Ppy	ACTR2_Ptr	0.0052402	0	0.0223342	0
Complex group18	ACTR2_Ppy	ACTR2_Nle	0.00787409	0	0.0337557	0
Complex group18	ACTR2_Ppy	ACTR2_Mmu	0.00875411	0	0.0375548	0
Complex group18	ACTR2_Ppy	ACTR2_Cja	0.0202894	0	0.0895133	0
Complex group18	ACTR2_Ppy	ACTR2_Ggo	0.0846746	0.0766752	0.111204	0.689499
Complex group18	ACTR2_Ppy	LOC100449729_PPY	0.041143	0.034315	0.0638684	0.537276
Complex group18	ACTR2_Ppy	ENSMMUP00000008082	0.102835	0.0949016	0.129465	0.733027
Complex group18	ACTR2_Ppy	ENSMMUP00000009866	0.0664814	0.0593279	0.0898381	0.660387
Complex group18	ACTR2_Mmu	ACTR2_Hsa	0.0156256	0.0103886	0.0327685	0.317032
Complex group18	ACTR2_Mmu	ACTR2_Ptr	0.0156256	0.0103886	0.0327685	0.317032
Complex group18	ACTR2_Mmu	ACTR2_Nle	0.0156256	0.0067925	0.0446782	0.152032
Complex group18	ACTR2_Mmu	ACTR2_Ppy	0.00875411	0	0.0375548	0
Complex group18	ACTR2_Mmu	ACTR2_Cja	0.0193957	0	0.0852805	0
Complex group18	ACTR2_Mmu	ACTR2_Ggo	0.0856495	0.0777582	0.11177	0.6957
Complex group18	ACTR2_Mmu	LOC100449729_PPY	0.041143	0.0343283	0.063786	0.538179
Complex group18	ACTR2_Mmu	ENSMMUP00000008082	0.101114	0.0949016	0.121866	0.77874
Complex group18	ACTR2_Mmu	ENSMMUP00000009866	0.0645258	0.0593521	0.0812944	0.730089
Complex group18	ACTR2_Cja	ACTR2_Hsa	0.0176116	0	0.0772137	0
Complex group18	ACTR2_Cja	ACTR2_Ptr	0.0193957	0	0.085391	0
Complex group18	ACTR2_Cja	ACTR2_Nle	0.0202894	0	0.0895133	0
Complex group18	ACTR2_Cja	ACTR2_Ppy	0.0202894	0	0.0895133	0
Complex group18	ACTR2_Cja	ACTR2_Mmu	0.0193957	0	0.0852805	0
Complex group18	ACTR2_Cja	ACTR2_Ggo	0.100428	0.0770881	0.181529	0.424659
Complex group18	ACTR2_Cja	LOC100449729_PPY	0.0559995	0.0355027	0.127106	0.279315
Complex group18	ACTR2_Cja	ENSMMUP00000008082	0.113239	0.0949016	0.176756	0.536907
Complex group18	ACTR2_Cja	ENSMMUP00000009866	0.0743555	0.0593219	0.124606	0.476074
Complex group18	ACTR2_Ggo	ACTR2_Hsa	0.0837009	0.0777271	0.103396	0.75174
Complex group18	ACTR2_Ggo	ACTR2_Ptr	0.0837009	0.0777271	0.103396	0.75174
Complex group18	ACTR2_Ggo	ACTR2_Nle	0.0885821	0.0777271	0.124885	0.622389
Complex group18	ACTR2_Ggo	ACTR2_Ppy	0.0846746	0.0766752	0.111204	0.689499
Complex group18	ACTR2_Ggo	ACTR2_Mmu	0.0856495	0.0777582	0.11177	0.6957
Complex group18	ACTR2_Ggo	ACTR2_Cja	0.100428	0.0770881	0.181529	0.424659
Complex group18	ACTR2_Ggo	LOC100449729_PPY	0.119576	0.111538	0.146657	0.760538
Complex group18	ACTR2_Ggo	ENSMMUP00000008082	0.232207	0.219159	0.27736	0.79016
Complex group18	ACTR2_Ggo	ENSMMUP00000009866	0.147026	0.139358	0.172303	0.808795
Complex group18	LOC100449729_PPY	ACTR2_Hsa	0.0374743	0.034315	0.0478784	0.716711
Complex group18	LOC100449729_PPY	ACTR2_Ptr	0.0374743	0.034315	0.0478784	0.716711
Complex group18	LOC100449729_PPY	ACTR2_Nle	0.0420629	0.034315	0.0679197	0.505229
Complex group18	LOC100449729_PPY	ACTR2_Ppy	0.041143	0.034315	0.0638684	0.537276
Complex group18	LOC100449729_PPY	ACTR2_Mmu	0.041143	0.0343283	0.063786	0.538179
Complex group18	LOC100449729_PPY	ACTR2_Cja	0.0559995	0.0355027	0.127106	0.279315
Complex group18	LOC100449729_PPY	ACTR2_Ggo	0.119576	0.111538	0.146657	0.760538
Complex group18	LOC100449729_PPY	ENSMMUP00000008082	0.125564	0.126357	0.122938	1.02781
Complex group18	LOC100449729_PPY	ENSMMUP00000009866	0.0974652	0.0901612	0.121707	0.740804
Complex group18	ENSMMUP00000008082	ACTR2_Hsa	0.0993982	0.0949016	0.114342	0.829981
Complex group18	ENSMMUP00000008082	ACTR2_Ptr	0.101114	0.0949016	0.121866	0.77874
Complex group18	ENSMMUP00000008082	ACTR2_Nle	0.108019	0.0949016	0.152738	0.621336
Complex group18	ENSMMUP00000008082	ACTR2_Ppy	0.102835	0.0949016	0.129465	0.733027
Complex group18	ENSMMUP00000008082	ACTR2_Mmu	0.101114	0.0949016	0.121866	0.77874
Complex group18	ENSMMUP00000008082	ACTR2_Cja	0.113239	0.0949016	0.176756	0.536907
Complex group18	ENSMMUP00000008082	ACTR2_Ggo	0.232207	0.219159	0.27736	0.79016
Complex group18	ENSMMUP00000008082	LOC100449729_PPY	0.125564	0.126357	0.122938	1.02781
Complex group18	ENSMMUP00000008082	ENSMMUP00000009866	0.0961183	0.0946891	0.100788	0.939491
Complex group18	ENSMMUP00000009866	ACTR2_Hsa	0.0625752	0.0593279	0.07306	0.812043
Complex group18	ENSMMUP00000009866	ACTR2_Ptr	0.0645258	0.0593279	0.0814021	0.728825
Complex group18	ENSMMUP00000009866	ACTR2_Nle	0.0694245	0.0593279	0.102673	0.577836
Complex group18	ENSMMUP00000009866	ACTR2_Ppy	0.0664814	0.0593279	0.0898381	0.660387
Complex group18	ENSMMUP00000009866	ACTR2_Mmu	0.0645258	0.0593521	0.0812944	0.730089
Complex group18	ENSMMUP00000009866	ACTR2_Cja	0.0743555	0.0593219	0.124606	0.476074
Complex group18	ENSMMUP00000009866	ACTR2_Ggo	0.147026	0.139358	0.172303	0.808795
Complex group18	ENSMMUP00000009866	LOC100449729_PPY	0.0974652	0.0901612	0.121707	0.740804
Complex group18	ENSMMUP00000009866	ENSMMUP00000008082	0.0961183	0.0946891	0.100788	0.939491
Complex group19	ACTR3B_Hsa	ACTR3B_Ptr	0.00355451	0	0.0150193	0
Complex group19	ACTR3B_Hsa	ACTR3B_Ppy	0.00355451	0	0.0150193	0
Complex group19	ACTR3B_Hsa	ACTR3B_Mmu	0.0143202	0	0.0619707	0
Complex group19	ACTR3B_Hsa	ACTR3B_Cja	0.0143202	0	0.0621312	0
Complex group19	ACTR3B_Ptr	ACTR3B_Hsa	0.00355451	0	0.0150193	0
Complex group19	ACTR3B_Ptr	ACTR3B_Ppy	0	0	0	0
Complex group19	ACTR3B_Ptr	ACTR3B_Mmu	0.0143202	0	0.0619707	0
Complex group19	ACTR3B_Ptr	ACTR3B_Cja	0.0107145	0	0.0461093	0
Complex group19	ACTR3B_Ppy	ACTR3B_Hsa	0.00355451	0	0.0150193	0
Complex group19	ACTR3B_Ppy	ACTR3B_Ptr	0	0	0	0
Complex group19	ACTR3B_Ppy	ACTR3B_Mmu	0.0143202	0	0.0619707	0
Complex group19	ACTR3B_Ppy	ACTR3B_Cja	0.0107145	0	0.0461093	0
Complex group19	ACTR3B_Mmu	ACTR3B_Hsa	0.0143202	0	0.0619707	0
Complex group19	ACTR3B_Mmu	ACTR3B_Ptr	0.0143202	0	0.0619707	0
Complex group19	ACTR3B_Mmu	ACTR3B_Ppy	0.0143202	0	0.0619707	0
Complex group19	ACTR3B_Mmu	ACTR3B_Cja	0.0215842	0	0.0952401	0
Complex group19	ACTR3B_Cja	ACTR3B_Hsa	0.0143202	0	0.0621312	0
Complex group19	ACTR3B_Cja	ACTR3B_Ptr	0.0107145	0	0.0461093	0
Complex group19	ACTR3B_Cja	ACTR3B_Ppy	0.0107145	0	0.0461093	0
Complex group19	ACTR3B_Cja	ACTR3B_Mmu	0.0215842	0	0.0952401	0
Complex group3	ENSCJAP00000042651	LOC100404409_Cja	0.0675524	0.0697868	0.0604195	1.15504
Complex group3	ENSCJAP00000042651	LOC100412618_Cja	0.0605167	0.0606182	0.0601921	1.00708
Complex group3	ENSCJAP00000042651	LOC100404148_CJA	0.0631953	0.0646946	0.0583894	1.10799
Complex group3	LOC100404409_Cja	ENSCJAP00000042651	0.0675524	0.0697868	0.0604195	1.15504
Complex group3	LOC100404409_Cja	LOC100412618_Cja	0.00569047	0.00750569	0	0
Complex group3	LOC100404409_Cja	LOC100404148_CJA	0.00722897	0.00952142	0	0
Complex group3	LOC100412618_Cja	ENSCJAP00000042651	0.0605167	0.0606182	0.0601921	1.00708
Complex group3	LOC100412618_Cja	LOC100404409_Cja	0.00569047	0.00750569	0	0
Complex group3	LOC100412618_Cja	LOC100404148_CJA	0.00562327	0.00616907	0.00389864	1.58236
Complex group3	LOC100404148_CJA	ENSCJAP00000042651	0.0631953	0.0646946	0.0583894	1.10799
Complex group3	LOC100404148_CJA	LOC100404409_Cja	0.00722897	0.00952142	0	0
Complex group3	LOC100404148_CJA	LOC100412618_Cja	0.00562327	0.00616907	0.00389864	1.58236
Complex group20	ENSMMUP00000040956	LOC743316_PTR	0.0636987	0.0508382	0.110177	0.461422
Complex group20	ENSMMUP00000040956	LOC740963_PTR	0.0499747	0.0403233	0.0847675	0.475692
Complex group20	ENSMMUP00000040956	LOC100607416_Nle	0.148421	0.137735	0.187068	0.736284
Complex group20	LOC743316_PTR	ENSMMUP00000040956	0.0636987	0.0508382	0.110177	0.461422
Complex group20	LOC743316_PTR	LOC740963_PTR	0.0136102	0.0124899	0.0175447	0.711891
Complex group20	LOC743316_PTR	LOC100607416_Nle	0.0334921	0.0277401	0.0540369	0.513355
Complex group20	LOC740963_PTR	ENSMMUP00000040956	0.0499747	0.0403233	0.0847675	0.475692
Complex group20	LOC740963_PTR	LOC743316_PTR	0.0136102	0.0124899	0.0175447	0.711891
Complex group20	LOC740963_PTR	LOC100607416_Nle	0.0234853	0.0200471	0.0357476	0.560796
Complex group20	LOC100607416_Nle	ENSMMUP00000040956	0.148421	0.137735	0.187068	0.736284
Complex group20	LOC100607416_Nle	LOC743316_PTR	0.0334921	0.0277401	0.0540369	0.513355
Complex group20	LOC100607416_Nle	LOC740963_PTR	0.0234853	0.0200471	0.0357476	0.560796
Complex group17	ACTR5_Hsa	ACTR5_Ptr	0.0049917	0.00330215	0.0102216	0.323056
Complex group17	ACTR5_Hsa	ACTR5_Nle	0.0100168	0.00330215	0.0310925	0.106204
Complex group17	ACTR5_Hsa	ACTR5_Ppy	0.0138079	0.00495597	0.0418227	0.118499
Complex group17	ACTR5_Hsa	ACTR5_Mmu	0.0265851	0.00662439	0.0914291	0.0724538
Complex group17	ACTR5_Hsa	ACTR5_Cja	0.0501472	0.0133004	0.176447	0.0753793
Complex group17	ACTR5_Ptr	ACTR5_Hsa	0.0049917	0.00330215	0.0102216	0.323056
Complex group17	ACTR5_Ptr	ACTR5_Nle	0.0049917	0	0.0206376	0
Complex group17	ACTR5_Ptr	ACTR5_Ppy	0.0087574	0.00164699	0.0312274	0.052742
Complex group17	ACTR5_Ptr	ACTR5_Mmu	0.0214481	0.00330215	0.0802905	0.0411276
Complex group17	ACTR5_Ptr	ACTR5_Cja	0.0474923	0.0132894	0.164186	0.0809408
Complex group17	ACTR5_Nle	ACTR5_Hsa	0.0100168	0.00330215	0.0310925	0.106204
Complex group17	ACTR5_Nle	ACTR5_Ptr	0.0049917	0	0.0206376	0
Complex group17	ACTR5_Nle	ACTR5_Ppy	0.0112784	0.00164699	0.0419323	0.0392775
Complex group17	ACTR5_Nle	ACTR5_Mmu	0.0240122	0.00330215	0.0916759	0.0360198
Complex group17	ACTR5_Nle	ACTR5_Cja	0.0474923	0.0132894	0.164186	0.0809408
Complex group17	ACTR5_Ppy	ACTR5_Hsa	0.0138079	0.00495597	0.0418227	0.118499
Complex group17	ACTR5_Ppy	ACTR5_Ptr	0.0087574	0.00164699	0.0312274	0.052742
Complex group17	ACTR5_Ppy	ACTR5_Nle	0.0112784	0.00164699	0.0419323	0.0392775
Complex group17	ACTR5_Ppy	ACTR5_Mmu	0.0278748	0.00495597	0.103424	0.0479187
Complex group17	ACTR5_Ppy	ACTR5_Cja	0.0514782	0.0157988	0.174073	0.0907598
Complex group17	ACTR5_Mmu	ACTR5_Hsa	0.0265851	0.00662439	0.0914291	0.0724538
Complex group17	ACTR5_Mmu	ACTR5_Ptr	0.0214481	0.00330215	0.0802905	0.0411276
Complex group17	ACTR5_Mmu	ACTR5_Nle	0.0240122	0.00330215	0.0916759	0.0360198
Complex group17	ACTR5_Mmu	ACTR5_Ppy	0.0278748	0.00495597	0.103424	0.0479187
Complex group17	ACTR5_Mmu	ACTR5_Cja	0.0474923	0.0133004	0.163721	0.0812383
Complex group17	ACTR5_Cja	ACTR5_Hsa	0.0501472	0.0133004	0.176447	0.0753793
Complex group17	ACTR5_Cja	ACTR5_Ptr	0.0474923	0.0132894	0.164186	0.0809408
Complex group17	ACTR5_Cja	ACTR5_Nle	0.0474923	0.0132894	0.164186	0.0809408
Complex group17	ACTR5_Cja	ACTR5_Ppy	0.0514782	0.0157988	0.174073	0.0907598
Complex group17	ACTR5_Cja	ACTR5_Mmu	0.0474923	0.0133004	0.163721	0.0812383
Complex group4	ENSGGOP00000019641	LOC744996_PTR	0.264764	0.234345	0.380896	0.615247
Complex group4	ENSGGOP00000019641	LOC100455972_Ppy	0.296094	0.257428	0.449917	0.572167
Complex group4	LOC744996_PTR	ENSGGOP00000019641	0.264764	0.234345	0.380896	0.615247
Complex group4	LOC744996_PTR	LOC100455972_Ppy	0.126467	0.116402	0.164177	0.709006
Complex group4	LOC100455972_Ppy	ENSGGOP00000019641	0.296094	0.257428	0.449917	0.572167
Complex group4	LOC100455972_Ppy	LOC744996_PTR	0.126467	0.116402	0.164177	0.709006
Complex group1	LOC100436479_Ppy	POTEE_Ggo	0.0422777	0.0244798	0.101817	0.240429
Complex group1	LOC100436479_Ppy	LOC101139634_Ggo	0.0338163	0.0154171	0.0957155	0.161072
Complex group1	LOC100436479_Ppy	POTEF_Hsa	0.0357866	0.0154691	0.104342	0.148254
Complex group1	LOC100436479_Ppy	AC131180.1_Hsa	0.0291564	0.0118334	0.0871981	0.135707
Complex group1	LOC100436479_Ppy	POTEJ_Hsa	0.0356883	0.0177769	0.0964538	0.184304
Complex group1	LOC100436479_Ppy	POTEI_Hsa	0.0338163	0.0153988	0.0960993	0.160239
Complex group1	LOC100436479_Ppy	POTEE_Ptr	0.0348473	0.0118615	0.113308	0.104683
Complex group1	LOC100436479_Ppy	LOC741762_Ptr	0.0331546	0.0119038	0.105902	0.112404
Complex group1	LOC100436479_Ppy	POTEF_Ptr	0.0300861	0.00944801	0.100048	0.0944346
Complex group1	LOC100436479_Ppy	POTEI_Ptr	0.0292363	0.0118685	0.0873714	0.13584
Complex group1	POTEE_Ggo	LOC100436479_Ppy	0.0422777	0.0244798	0.101817	0.240429
Complex group1	POTEE_Ggo	LOC101139634_Ggo	0.0300861	0.0280825	0.036534	0.768669
Complex group1	POTEE_Ggo	POTEF_Hsa	0.0339093	0.0287891	0.0504882	0.570216
Complex group1	POTEE_Ggo	AC131180.1_Hsa	0.0273006	0.0250495	0.034544	0.725149
Complex group1	POTEE_Ggo	POTEJ_Hsa	0.0319489	0.028626	0.0427854	0.66906
Complex group1	POTEE_Ggo	POTEI_Hsa	0.0319489	0.0286574	0.0426334	0.672181
Complex group1	POTEE_Ggo	POTEE_Ptr	0.0273753	0.022686	0.0425783	0.532807
Complex group1	POTEE_Ggo	LOC741762_Ptr	0.0247275	0.0209448	0.0370566	0.565211
Complex group1	POTEE_Ggo	POTEF_Ptr	0.0245253	0.0220145	0.0326243	0.674788
Complex group1	POTEE_Ggo	POTEI_Ptr	0.0264465	0.0233063	0.0365574	0.637527
Complex group1	LOC101139634_Ggo	LOC100436479_Ppy	0.0338163	0.0154171	0.0957155	0.161072
Complex group1	LOC101139634_Ggo	POTEE_Ggo	0.0300861	0.0280825	0.036534	0.768669
Complex group1	LOC101139634_Ggo	POTEF_Hsa	0.0218197	0.0160434	0.0406289	0.394876
Complex group1	LOC101139634_Ggo	AC131180.1_Hsa	0.0153481	0.0124092	0.0248589	0.499185
Complex group1	LOC101139634_Ggo	POTEJ_Hsa	0.0217604	0.0183459	0.0329404	0.556943
Complex group1	LOC101139634_Ggo	POTEI_Hsa	0.0199227	0.0159706	0.0328238	0.486557
Complex group1	LOC101139634_Ggo	POTEE_Ptr	0.019977	0.010649	0.0507676	0.209759
Complex group1	LOC101139634_Ggo	LOC741762_Ptr	0.0173155	0.0106869	0.039199	0.272632
Complex group1	LOC101139634_Ggo	POTEF_Ptr	0.0126167	0.0082467	0.0268399	0.307255
Complex group1	LOC101139634_Ggo	POTEI_Ptr	0.0153898	0.0106553	0.0307735	0.346248
Complex group1	POTEF_Hsa	LOC100436479_Ppy	0.0357866	0.0154691	0.104342	0.148254
Complex group1	POTEF_Hsa	POTEE_Ggo	0.0339093	0.0287891	0.0504882	0.570216
Complex group1	POTEF_Hsa	LOC101139634_Ggo	0.0218197	0.0160434	0.0406289	0.394876
Complex group1	POTEF_Hsa	AC131180.1_Hsa	0.00810819	0.00590322	0.0152096	0.388123
Complex group1	POTEF_Hsa	POTEJ_Hsa	0.0126509	0.0118241	0.0153311	0.771247
Complex group1	POTEF_Hsa	POTEI_Hsa	0.0144757	0.0118369	0.0230344	0.513878
Complex group1	POTEF_Hsa	POTEE_Ptr	0.0209549	0.01308	0.0467684	0.279676
Complex group1	POTEF_Hsa	LOC741762_Ptr	0.0173629	0.0119239	0.0352086	0.338666
Complex group1	POTEF_Hsa	POTEF_Ptr	0.0181387	0.0106553	0.0426471	0.249847
Complex group1	POTEF_Hsa	POTEI_Ptr	0.0200315	0.0130878	0.0426747	0.306687
Complex group1	AC131180.1_Hsa	LOC100436479_Ppy	0.0291564	0.0118334	0.0871981	0.135707
Complex group1	AC131180.1_Hsa	POTEE_Ggo	0.0273006	0.0250495	0.034544	0.725149
Complex group1	AC131180.1_Hsa	LOC101139634_Ggo	0.0153481	0.0124092	0.0248589	0.499185
Complex group1	AC131180.1_Hsa	POTEF_Hsa	0.00810819	0.00590322	0.0152096	0.388123
Complex group1	AC131180.1_Hsa	POTEJ_Hsa	0.0098952	0.0105998	0.0076167	1.39166
Complex group1	AC131180.1_Hsa	POTEI_Hsa	0.00808633	0.00824022	0.0075902	1.08564
Complex group1	AC131180.1_Hsa	POTEE_Ptr	0.0144757	0.00946012	0.0308131	0.307016
Complex group1	AC131180.1_Hsa	LOC741762_Ptr	0.0108895	0.00830048	0.019331	0.429388
Complex group1	AC131180.1_Hsa	POTEF_Ptr	0.0117084	0.00706442	0.0268228	0.263374
Complex group1	AC131180.1_Hsa	POTEI_Ptr	0.0135628	0.00946571	0.0268399	0.352673
Complex group1	POTEJ_Hsa	LOC100436479_Ppy	0.0356883	0.0177769	0.0964538	0.184304
Complex group1	POTEJ_Hsa	POTEE_Ggo	0.0319489	0.028626	0.0427854	0.66906
Complex group1	POTEJ_Hsa	LOC101139634_Ggo	0.0217604	0.0183459	0.0329404	0.556943
Complex group1	POTEJ_Hsa	POTEF_Hsa	0.0126509	0.0118241	0.0153311	0.771247
Complex group1	POTEJ_Hsa	AC131180.1_Hsa	0.0098952	0.0105998	0.0076167	1.39166
Complex group1	POTEJ_Hsa	POTEI_Hsa	0.00538119	0.00468614	0.00765069	0.612513
Complex group1	POTEJ_Hsa	POTEE_Ptr	0.0208978	0.0153958	0.0390332	0.394428
Complex group1	POTEJ_Hsa	LOC741762_Ptr	0.018238	0.0154507	0.0274272	0.563335
Complex group1	POTEJ_Hsa	POTEF_Ptr	0.0180895	0.0129707	0.0349465	0.37116
Complex group1	POTEJ_Hsa	POTEI_Ptr	0.019977	0.0154049	0.0349691	0.440529
Complex group1	POTEI_Hsa	LOC100436479_Ppy	0.0338163	0.0153988	0.0960993	0.160239
Complex group1	POTEI_Hsa	POTEE_Ggo	0.0319489	0.0286574	0.0426334	0.672181
Complex group1	POTEI_Hsa	LOC101139634_Ggo	0.0199227	0.0159706	0.0328238	0.486557
Complex group1	POTEI_Hsa	POTEF_Hsa	0.0144757	0.0118369	0.0230344	0.513878
Complex group1	POTEI_Hsa	AC131180.1_Hsa	0.00808633	0.00824022	0.0075902	1.08564
Complex group1	POTEI_Hsa	POTEJ_Hsa	0.00538119	0.00468614	0.00765069	0.612513
Complex group1	POTEI_Hsa	POTEE_Ptr	0.0190573	0.0130206	0.038894	0.334773
Complex group1	POTEI_Hsa	LOC741762_Ptr	0.0163941	0.013067	0.027329	0.478139
Complex group1	POTEI_Hsa	POTEF_Ptr	0.0162608	0.0106071	0.0348225	0.304606
Complex group1	POTEI_Hsa	POTEI_Ptr	0.0181387	0.0130284	0.034845	0.373895
Complex group1	POTEE_Ptr	LOC100436479_Ppy	0.0348473	0.0118615	0.113308	0.104683
Complex group1	POTEE_Ptr	POTEE_Ggo	0.0273753	0.022686	0.0425783	0.532807
Complex group1	POTEE_Ptr	LOC101139634_Ggo	0.019977	0.010649	0.0507676	0.209759
Complex group1	POTEE_Ptr	POTEF_Hsa	0.0209549	0.01308	0.0467684	0.279676
Complex group1	POTEE_Ptr	AC131180.1_Hsa	0.0144757	0.00946012	0.0308131	0.307016
Complex group1	POTEE_Ptr	POTEJ_Hsa	0.0208978	0.0153958	0.0390332	0.394428
Complex group1	POTEE_Ptr	POTEI_Hsa	0.0190573	0.0130206	0.038894	0.334773
Complex group1	POTEE_Ptr	LOC741762_Ptr	0.00815225	0.00472815	0.0193809	0.243959
Complex group1	POTEE_Ptr	POTEF_Ptr	0.0126509	0.00471329	0.0387683	0.121576
Complex group1	POTEE_Ptr	POTEI_Ptr	0.0153898	0.00471422	0.0507676	0.0928588
Complex group1	LOC741762_Ptr	LOC100436479_Ppy	0.0331546	0.0119038	0.105902	0.112404
Complex group1	LOC741762_Ptr	POTEE_Ggo	0.0247275	0.0209448	0.0370566	0.565211
Complex group1	LOC741762_Ptr	LOC101139634_Ggo	0.0173155	0.0106869	0.039199	0.272632
Complex group1	LOC741762_Ptr	POTEF_Hsa	0.0173629	0.0119239	0.0352086	0.338666
Complex group1	LOC741762_Ptr	AC131180.1_Hsa	0.0108895	0.00830048	0.019331	0.429388
Complex group1	LOC741762_Ptr	POTEJ_Hsa	0.018238	0.0154507	0.0274272	0.563335
Complex group1	LOC741762_Ptr	POTEI_Hsa	0.0163941	0.013067	0.027329	0.478139
Complex group1	LOC741762_Ptr	POTEE_Ptr	0.00815225	0.00472815	0.0193809	0.243959
Complex group1	LOC741762_Ptr	POTEF_Ptr	0.0118041	0.00473001	0.0352086	0.134343
Complex group1	LOC741762_Ptr	POTEI_Ptr	0.0127199	0.00473094	0.039199	0.12069
Complex group1	POTEF_Ptr	LOC100436479_Ppy	0.0300861	0.00944801	0.100048	0.0944346
Complex group1	POTEF_Ptr	POTEE_Ggo	0.0245253	0.0220145	0.0326243	0.674788
Complex group1	POTEF_Ptr	LOC101139634_Ggo	0.0126167	0.0082467	0.0268399	0.307255
Complex group1	POTEF_Ptr	POTEF_Hsa	0.0181387	0.0106553	0.0426471	0.249847
Complex group1	POTEF_Ptr	AC131180.1_Hsa	0.0117084	0.00706442	0.0268228	0.263374
Complex group1	POTEF_Ptr	POTEJ_Hsa	0.0180895	0.0129707	0.0349465	0.37116
Complex group1	POTEF_Ptr	POTEI_Hsa	0.0162608	0.0106071	0.0348225	0.304606
Complex group1	POTEF_Ptr	POTEE_Ptr	0.0126509	0.00471329	0.0387683	0.121576
Complex group1	POTEF_Ptr	LOC741762_Ptr	0.0118041	0.00473001	0.0352086	0.134343
Complex group1	POTEF_Ptr	POTEI_Ptr	0.00810819	0.00471607	0.0190971	0.246952
Complex group1	POTEI_Ptr	LOC100436479_Ppy	0.0292363	0.0118685	0.0873714	0.13584
Complex group1	POTEI_Ptr	POTEE_Ggo	0.0264465	0.0233063	0.0365574	0.637527
Complex group1	POTEI_Ptr	LOC101139634_Ggo	0.0153898	0.0106553	0.0307735	0.346248
Complex group1	POTEI_Ptr	POTEF_Hsa	0.0200315	0.0130878	0.0426747	0.306687
Complex group1	POTEI_Ptr	AC131180.1_Hsa	0.0135628	0.00946571	0.0268399	0.352673
Complex group1	POTEI_Ptr	POTEJ_Hsa	0.019977	0.0154049	0.0349691	0.440529
Complex group1	POTEI_Ptr	POTEI_Hsa	0.0181387	0.0130284	0.034845	0.373895
Complex group1	POTEI_Ptr	POTEE_Ptr	0.0153898	0.00471422	0.0507676	0.0928588
Complex group1	POTEI_Ptr	LOC741762_Ptr	0.0127199	0.00473094	0.039199	0.12069
Complex group1	POTEI_Ptr	POTEF_Ptr	0.00810819	0.00471607	0.0190971	0.246952
Complex group5	ENSMMUP00000000833	LOC101057883_PTR	0.225656	0.20993	0.278463	0.753888
Complex group5	ENSMMUP00000000833	LOC101140619_GGO	0.195375	0.182847	0.237804	0.768896
Complex group5	LOC101057883_PTR	ENSMMUP00000000833	0.225656	0.20993	0.278463	0.753888
Complex group5	LOC101057883_PTR	LOC101140619_GGO	0.0155446	0.0158377	0.014599	1.08485
Complex group5	LOC101140619_GGO	ENSMMUP00000000833	0.195375	0.182847	0.237804	0.768896
Complex group5	LOC101140619_GGO	LOC101057883_PTR	0.0155446	0.0158377	0.014599	1.08485
Complex group6	ACTG1_Hsa	ACTG1_Ggo	0.0103916	0	0.0430843	0
Complex group6	ACTG1_Hsa	ACTG1_Ppy	0.0230546	0	0.098502	0
Complex group6	ACTG1_Hsa	ACTG1_Nle	0.0273235	0	0.117889	0
Complex group6	ACTG1_Hsa	ACTB_3_Mmu	0.0435521	0	0.195645	0
Complex group6	ACTG1_Hsa	ENSMMUP00000013958	0.0815231	0.0549975	0.171404	0.320864
Complex group6	ACTG1_Ggo	ACTG1_Hsa	0.0103916	0	0.0430843	0
Complex group6	ACTG1_Ggo	ACTG1_Ppy	0.0245253	0	0.106268	0
Complex group6	ACTG1_Ggo	ACTG1_Nle	0.0300861	0	0.132077	0
Complex group6	ACTG1_Ggo	ACTB_3_Mmu	0.0432237	0	0.196474	0
Complex group6	ACTG1_Ggo	ENSMMUP00000013958	0.0808437	0.0541002	0.172803	0.313073
Complex group6	ACTG1_Ppy	ACTG1_Hsa	0.0230546	0	0.098502	0
Complex group6	ACTG1_Ppy	ACTG1_Ggo	0.0245253	0	0.106268	0
Complex group6	ACTG1_Ppy	ACTG1_Nle	0.032882	0	0.145617	0
Complex group6	ACTG1_Ppy	ACTB_3_Mmu	0.0422777	0	0.192113	0
Complex group6	ACTG1_Ppy	ENSMMUP00000013958	0.0880776	0.0547183	0.205522	0.26624
Complex group6	ACTG1_Nle	ACTG1_Hsa	0.0273235	0	0.117889	0
Complex group6	ACTG1_Nle	ACTG1_Ggo	0.0300861	0	0.132077	0
Complex group6	ACTG1_Nle	ACTG1_Ppy	0.032882	0	0.145617	0
Complex group6	ACTG1_Nle	ACTB_3_Mmu	0.0460691	0	0.211399	0
Complex group6	ACTG1_Nle	ENSMMUP00000013958	0.0829034	0.0547183	0.18052	0.303115
Complex group6	ACTB_3_Mmu	ACTG1_Hsa	0.0435521	0	0.195645	0
Complex group6	ACTB_3_Mmu	ACTG1_Ggo	0.0432237	0	0.196474	0
Complex group6	ACTB_3_Mmu	ACTG1_Ppy	0.0422777	0	0.192113	0
Complex group6	ACTB_3_Mmu	ACTG1_Nle	0.0460691	0	0.211399	0
Complex group6	ACTB_3_Mmu	ENSMMUP00000013958	0.0847203	0.0556023	0.186212	0.298597
Complex group6	ENSMMUP00000013958	ACTG1_Hsa	0.0815231	0.0549975	0.171404	0.320864
Complex group6	ENSMMUP00000013958	ACTG1_Ggo	0.0808437	0.0541002	0.172803	0.313073
Complex group6	ENSMMUP00000013958	ACTG1_Ppy	0.0880776	0.0547183	0.205522	0.26624
Complex group6	ENSMMUP00000013958	ACTG1_Nle	0.0829034	0.0547183	0.18052	0.303115
Complex group6	ENSMMUP00000013958	ACTB_3_Mmu	0.0847203	0.0556023	0.186212	0.298597
Complex group7	ENSCJAP00000038446	LOC100396891_CJA	0.0640892	0.0426901	0.136978	0.311656
Complex group7	ENSCJAP00000038446	LOC100398645_Cja	0.0636458	0.0431508	0.132576	0.325481
Complex group7	ENSCJAP00000038446	LOC100410882_Cja	0.0595213	0.0341661	0.146706	0.232889
Complex group7	ENSCJAP00000038446	LOC100409006_Cja	0.0564176	0.0316638	0.140471	0.225411
Complex group7	ENSCJAP00000038446	LOC100406907_Cja	0.0554416	0.0316381	0.136316	0.232093
Complex group7	LOC100396891_CJA	ENSCJAP00000038446	0.0640892	0.0426901	0.136978	0.311656
Complex group7	LOC100396891_CJA	LOC100398645_Cja	0.04454	0.0339623	0.0789944	0.429934
Complex group7	LOC100396891_CJA	LOC100410882_Cja	0.0368285	0.0264371	0.0708956	0.372902
Complex group7	LOC100396891_CJA	LOC100409006_Cja	0.0283052	0.0191284	0.0579812	0.329906
Complex group7	LOC100396891_CJA	LOC100406907_Cja	0.0301686	0.020324	0.0621715	0.326902
Complex group7	LOC100398645_Cja	ENSCJAP00000038446	0.0636458	0.0431508	0.132576	0.325481
Complex group7	LOC100398645_Cja	LOC100396891_CJA	0.04454	0.0339623	0.0789944	0.429934
Complex group7	LOC100398645_Cja	LOC100410882_Cja	0.0284612	0.0179973	0.062577	0.287602
Complex group7	LOC100398645_Cja	LOC100409006_Cja	0.0200315	0.0155679	0.034194	0.455281
Complex group7	LOC100398645_Cja	LOC100406907_Cja	0.022805	0.0179775	0.0381883	0.470759
Complex group7	LOC100410882_Cja	ENSCJAP00000038446	0.0595213	0.0341661	0.146706	0.232889
Complex group7	LOC100410882_Cja	LOC100396891_CJA	0.0368285	0.0264371	0.0708956	0.372902
Complex group7	LOC100410882_Cja	LOC100398645_Cja	0.0284612	0.0179973	0.062577	0.287602
Complex group7	LOC100410882_Cja	LOC100409006_Cja	0.0153898	0.00711397	0.0421163	0.168913
Complex group7	LOC100410882_Cja	LOC100406907_Cja	0.016305	0.00949286	0.0382858	0.247947
Complex group7	LOC100409006_Cja	ENSCJAP00000038446	0.0564176	0.0316638	0.140471	0.225411
Complex group7	LOC100409006_Cja	LOC100396891_CJA	0.0283052	0.0191284	0.0579812	0.329906
Complex group7	LOC100409006_Cja	LOC100398645_Cja	0.0200315	0.0155679	0.034194	0.455281
Complex group7	LOC100409006_Cja	LOC100410882_Cja	0.0153898	0.00711397	0.0421163	0.168913
Complex group7	LOC100409006_Cja	LOC100406907_Cja	0.00448164	0.00236128	0.0111665	0.211462
Complex group7	LOC100406907_Cja	ENSCJAP00000038446	0.0554416	0.0316381	0.136316	0.232093
Complex group7	LOC100406907_Cja	LOC100396891_CJA	0.0301686	0.020324	0.0621715	0.326902
Complex group7	LOC100406907_Cja	LOC100398645_Cja	0.022805	0.0179775	0.0381883	0.470759
Complex group7	LOC100406907_Cja	LOC100410882_Cja	0.016305	0.00949286	0.0382858	0.247947
Complex group7	LOC100406907_Cja	LOC100409006_Cja	0.00448164	0.00236128	0.0111665	0.211462
Complex group8	LOC101139975_Ggo	LOC721299_Mmu	0.0832594	0.0742392	0.113701	0.652936
Complex group8	LOC101139975_Ggo	LOC100600663_Nle	0.122364	0.107366	0.174432	0.615517
Complex group8	LOC101139975_Ggo	LOC100437051_Ppy	0.0328583	0.024791	0.0594739	0.416838
Complex group8	LOC101139975_Ggo	LOC100615719_Ptr	0.0425372	0.0418334	0.0448304	0.933149
Complex group8	LOC721299_Mmu	LOC101139975_Ggo	0.0832594	0.0742392	0.113701	0.652936
Complex group8	LOC721299_Mmu	LOC100600663_Nle	0.108567	0.0967043	0.149788	0.645607
Complex group8	LOC721299_Mmu	LOC100437051_Ppy	0.043541	0.0352338	0.0707721	0.497848
Complex group8	LOC721299_Mmu	LOC100615719_Ptr	0.045726	0.0410183	0.0610036	0.672392
Complex group8	LOC100600663_Nle	LOC101139975_Ggo	0.122364	0.107366	0.174432	0.615517
Complex group8	LOC100600663_Nle	LOC721299_Mmu	0.108567	0.0967043	0.149788	0.645607
Complex group8	LOC100600663_Nle	LOC100437051_Ppy	0.132395	0.117484	0.182345	0.644296
Complex group8	LOC100600663_Nle	LOC100615719_Ptr	0.12215	0.112263	0.155171	0.723483
Complex group8	LOC100437051_Ppy	LOC101139975_Ggo	0.0328583	0.024791	0.0594739	0.416838
Complex group8	LOC100437051_Ppy	LOC721299_Mmu	0.043541	0.0352338	0.0707721	0.497848
Complex group8	LOC100437051_Ppy	LOC100600663_Nle	0.132395	0.117484	0.182345	0.644296
Complex group8	LOC100437051_Ppy	LOC100615719_Ptr	0.0270521	0.0226249	0.0411414	0.549931
Complex group8	LOC100615719_Ptr	LOC101139975_Ggo	0.0425372	0.0418334	0.0448304	0.933149
Complex group8	LOC100615719_Ptr	LOC721299_Mmu	0.045726	0.0410183	0.0610036	0.672392
Complex group8	LOC100615719_Ptr	LOC100600663_Nle	0.12215	0.112263	0.155171	0.723483
Complex group8	LOC100615719_Ptr	LOC100437051_Ppy	0.0270521	0.0226249	0.0411414	0.549931
Orthologous group2	ACTA1_Hsa	ACTA1_Ptr	0.00538119	0.00117716	0.0188334	0.0625041
Orthologous group2	ACTA1_Hsa	ACTA1_Nle	0.00901453	0	0.0381519	0
Orthologous group2	ACTA1_Hsa	ACTA1_Ppy	0.00628182	0	0.0264678	0
Orthologous group2	ACTA1_Hsa	ACTA1_Mmu	0.0171746	0	0.074231	0
Orthologous group2	ACTA1_Hsa	ACTA1_Cja	0.0291564	0	0.129177	0
Orthologous group2	ACTA1_Hsa	ACTA1_Ggo	0.0759403	0.0642887	0.113855	0.564657
Orthologous group2	ACTA1_Ptr	ACTA1_Hsa	0.00538119	0.00117716	0.0188334	0.0625041
Orthologous group2	ACTA1_Ptr	ACTA1_Nle	0.0126509	0.00118087	0.0500506	0.0235935
Orthologous group2	ACTA1_Ptr	ACTA1_Ppy	0.0098952	0.00117716	0.0381519	0.0308546
Orthologous group2	ACTA1_Ptr	ACTA1_Mmu	0.0190055	0.0011767	0.0784516	0.0149991
Orthologous group2	ACTA1_Ptr	ACTA1_Cja	0.032882	0.00117786	0.142705	0.00825376
Orthologous group2	ACTA1_Ptr	ACTA1_Ggo	0.0790204	0.0655912	0.123021	0.53317
Orthologous group2	ACTA1_Nle	ACTA1_Hsa	0.00901453	0	0.0381519	0
Orthologous group2	ACTA1_Nle	ACTA1_Ptr	0.0126509	0.00118087	0.0500506	0.0235935
Orthologous group2	ACTA1_Nle	ACTA1_Ppy	0.00810819	0	0.0342482	0
Orthologous group2	ACTA1_Nle	ACTA1_Mmu	0.0190573	0	0.0825981	0
Orthologous group2	ACTA1_Nle	ACTA1_Cja	0.031102	0	0.138228	0
Orthologous group2	ACTA1_Nle	ACTA1_Ggo	0.0833919	0.0645078	0.146029	0.441746
Orthologous group2	ACTA1_Ppy	ACTA1_Hsa	0.00628182	0	0.0264678	0
Orthologous group2	ACTA1_Ppy	ACTA1_Ptr	0.0098952	0.00117716	0.0381519	0.0308546
Orthologous group2	ACTA1_Ppy	ACTA1_Nle	0.00810819	0	0.0342482	0
Orthologous group2	ACTA1_Ppy	ACTA1_Mmu	0.0180895	0	0.0783491	0
Orthologous group2	ACTA1_Ppy	ACTA1_Cja	0.0300861	0	0.133596	0
Orthologous group2	ACTA1_Ppy	ACTA1_Ggo	0.0779923	0.0642887	0.12285	0.52331
Orthologous group2	ACTA1_Mmu	ACTA1_Hsa	0.0171746	0	0.074231	0
Orthologous group2	ACTA1_Mmu	ACTA1_Ptr	0.0190055	0.0011767	0.0784516	0.0149991
Orthologous group2	ACTA1_Mmu	ACTA1_Nle	0.0190573	0	0.0825981	0
Orthologous group2	ACTA1_Mmu	ACTA1_Ppy	0.0180895	0	0.0783491	0
Orthologous group2	ACTA1_Mmu	ACTA1_Cja	0.0319489	0	0.142705	0
Orthologous group2	ACTA1_Mmu	ACTA1_Ggo	0.0914688	0.0655912	0.179474	0.365463
Orthologous group2	ACTA1_Cja	ACTA1_Hsa	0.0291564	0	0.129177	0
Orthologous group2	ACTA1_Cja	ACTA1_Ptr	0.032882	0.00117786	0.142705	0.00825376
Orthologous group2	ACTA1_Cja	ACTA1_Nle	0.031102	0	0.138228	0
Orthologous group2	ACTA1_Cja	ACTA1_Ppy	0.0300861	0	0.133596	0
Orthologous group2	ACTA1_Cja	ACTA1_Mmu	0.0319489	0	0.142705	0
Orthologous group2	ACTA1_Cja	ACTA1_Ggo	0.0974821	0.0641661	0.212744	0.301612
Orthologous group2	ACTA1_Ggo	ACTA1_Hsa	0.0759403	0.0642887	0.113855	0.564657
Orthologous group2	ACTA1_Ggo	ACTA1_Ptr	0.0790204	0.0655912	0.123021	0.53317
Orthologous group2	ACTA1_Ggo	ACTA1_Nle	0.0833919	0.0645078	0.146029	0.441746
Orthologous group2	ACTA1_Ggo	ACTA1_Ppy	0.0779923	0.0642887	0.12285	0.52331
Orthologous group2	ACTA1_Ggo	ACTA1_Mmu	0.0914688	0.0655912	0.179474	0.365463
Orthologous group2	ACTA1_Ggo	ACTA1_Cja	0.0974821	0.0641661	0.212744	0.301612
Orthologous group9	ACTR6_Hsa	LOC452159_Ptr	0.00255537	0	0.0117037	0
Orthologous group9	ACTR6_Hsa	ACTR6_Nle	0.0102478	0	0.0478727	0
Orthologous group9	ACTR6_Hsa	ACTR6_Ppy	0.00681629	0	0.0315836	0
Orthologous group9	ACTR6_Hsa	ACTR6_Mmu	0.00993392	0	0.0465667	0
Orthologous group9	ACTR6_Hsa	A6MKU0_Cja	0.0206376	0.00108794	0.0944514	0.0115185
Orthologous group9	ACTR6_Hsa	ACTR6_Ggo	0.00425292	0.00108774	0.0156052	0.0697038
Orthologous group9	LOC452159_Ptr	ACTR6_Hsa	0.00255537	0	0.0117037	0
Orthologous group9	LOC452159_Ptr	ACTR6_Nle	0.00769238	0	0.035662	0
Orthologous group9	LOC452159_Ptr	ACTR6_Ppy	0.0042638	0	0.019609	0
Orthologous group9	LOC452159_Ptr	ACTR6_Mmu	0.00774058	0	0.0360275	0
Orthologous group9	LOC452159_Ptr	A6MKU0_Cja	0.0180732	0.00109111	0.0815466	0.0133802
Orthologous group9	LOC452159_Ptr	ACTR6_Ggo	0.00170261	0.00109091	0.00387598	0.281454
Orthologous group9	ACTR6_Nle	ACTR6_Hsa	0.0102478	0	0.0478727	0
Orthologous group9	ACTR6_Nle	LOC452159_Ptr	0.00769238	0	0.035662	0
Orthologous group9	ACTR6_Nle	ACTR6_Ppy	0.00853009	0	0.0396787	0
Orthologous group9	ACTR6_Nle	ACTR6_Mmu	0.0143916	0	0.068199	0
Orthologous group9	ACTR6_Nle	A6MKU0_Cja	0.0171583	0.00108804	0.0771209	0.0141082
Orthologous group9	ACTR6_Nle	ACTR6_Ggo	0.00938846	0.00108784	0.0396263	0.0274526
Orthologous group9	ACTR6_Ppy	ACTR6_Hsa	0.00681629	0	0.0315836	0
Orthologous group9	ACTR6_Ppy	LOC452159_Ptr	0.0042638	0	0.019609	0
Orthologous group9	ACTR6_Ppy	ACTR6_Nle	0.00853009	0	0.0396787	0
Orthologous group9	ACTR6_Ppy	ACTR6_Mmu	0.00882363	0	0.0412475	0
Orthologous group9	ACTR6_Ppy	A6MKU0_Cja	0.0171583	0.00108794	0.0771471	0.0141022
Orthologous group9	ACTR6_Ppy	ACTR6_Ggo	0.00596086	0.00108774	0.0235313	0.0462254
Orthologous group9	ACTR6_Mmu	ACTR6_Hsa	0.00993392	0	0.0465667	0
Orthologous group9	ACTR6_Mmu	LOC452159_Ptr	0.00774058	0	0.0360275	0
Orthologous group9	ACTR6_Mmu	ACTR6_Nle	0.0143916	0	0.068199	0
Orthologous group9	ACTR6_Mmu	ACTR6_Ppy	0.00882363	0	0.0412475	0
Orthologous group9	ACTR6_Mmu	A6MKU0_Cja	0.0200012	0	0.0959603	0
Orthologous group9	ACTR6_Mmu	ACTR6_Ggo	0.00882363	0	0.0412475	0
Orthologous group9	A6MKU0_Cja	ACTR6_Hsa	0.0206376	0.00108794	0.0944514	0.0115185
Orthologous group9	A6MKU0_Cja	LOC452159_Ptr	0.0180732	0.00109111	0.0815466	0.0133802
Orthologous group9	A6MKU0_Cja	ACTR6_Nle	0.0171583	0.00108804	0.0771209	0.0141082
Orthologous group9	A6MKU0_Cja	ACTR6_Ppy	0.0171583	0.00108794	0.0771471	0.0141022
Orthologous group9	A6MKU0_Cja	ACTR6_Mmu	0.0200012	0	0.0959603	0
Orthologous group9	A6MKU0_Cja	ACTR6_Ggo	0.0197663	0.00217826	0.0856326	0.0254372
Orthologous group9	ACTR6_Ggo	ACTR6_Hsa	0.00425292	0.00108774	0.0156052	0.0697038
Orthologous group9	ACTR6_Ggo	LOC452159_Ptr	0.00170261	0.00109091	0.00387598	0.281454
Orthologous group9	ACTR6_Ggo	ACTR6_Nle	0.00938846	0.00108784	0.0396263	0.0274526
Orthologous group9	ACTR6_Ggo	ACTR6_Ppy	0.00596086	0.00108774	0.0235313	0.0462254
Orthologous group9	ACTR6_Ggo	ACTR6_Mmu	0.00882363	0	0.0412475	0
Orthologous group9	ACTR6_Ggo	A6MKU0_Cja	0.0197663	0.00217826	0.0856326	0.0254372
Orthologous group10	ACTR10_Hsa	ACTR10_Ptr	0.00264317	0.00232942	0.00361773	0.643889
Orthologous group10	ACTR10_Hsa	ACTR10_Nle	0.0115216	0.00583945	0.0294065	0.198577
Orthologous group10	ACTR10_Hsa	ACTR10_Ppy	0.00884705	0.00466746	0.0219528	0.212614
Orthologous group10	ACTR10_Hsa	ACTR10_Mmu	0.106508	0.0884741	0.166494	0.531395
Orthologous group10	ACTR10_Hsa	ACTR10_Cja	0.0286859	0.00937512	0.0916004	0.102348
Orthologous group10	ACTR10_Hsa	ACTR10_Ggo	0.118515	0.105928	0.159681	0.663369
Orthologous group10	ACTR10_Ptr	ACTR10_Hsa	0.00264317	0.00232942	0.00361773	0.643889
Orthologous group10	ACTR10_Ptr	ACTR10_Nle	0.0142058	0.00818562	0.0331953	0.246589
Orthologous group10	ACTR10_Ptr	ACTR10_Ppy	0.0115216	0.00701008	0.0256984	0.272782
Orthologous group10	ACTR10_Ptr	ACTR10_Mmu	0.108554	0.0910771	0.166666	0.546464
Orthologous group10	ACTR10_Ptr	ACTR10_Cja	0.0314323	0.0117339	0.0957627	0.122531
Orthologous group10	ACTR10_Ptr	ACTR10_Ggo	0.121653	0.108602	0.164448	0.660402
Orthologous group10	ACTR10_Nle	ACTR10_Hsa	0.0115216	0.00583945	0.0294065	0.198577
Orthologous group10	ACTR10_Nle	ACTR10_Ptr	0.0142058	0.00818562	0.0331953	0.246589
Orthologous group10	ACTR10_Nle	ACTR10_Ppy	0.0151027	0.00349821	0.0522437	0.0669595
Orthologous group10	ACTR10_Nle	ACTR10_Mmu	0.10753	0.0897978	0.166437	0.539531
Orthologous group10	ACTR10_Nle	ACTR10_Cja	0.0305157	0.0081976	0.103846	0.0789403
Orthologous group10	ACTR10_Nle	ACTR10_Ggo	0.130086	0.110005	0.197198	0.557843
Orthologous group10	ACTR10_Ppy	ACTR10_Hsa	0.00884705	0.00466746	0.0219528	0.212614
Orthologous group10	ACTR10_Ppy	ACTR10_Ptr	0.0115216	0.00701008	0.0256984	0.272782
Orthologous group10	ACTR10_Ppy	ACTR10_Nle	0.0151027	0.00349821	0.0522437	0.0669595
Orthologous group10	ACTR10_Ppy	ACTR10_Mmu	0.109579	0.0884741	0.180432	0.490346
Orthologous group10	ACTR10_Ppy	ACTR10_Cja	0.03235	0.00702033	0.116362	0.0603319
Orthologous group10	ACTR10_Ppy	ACTR10_Ggo	0.126913	0.108636	0.187693	0.578797
Orthologous group10	ACTR10_Mmu	ACTR10_Hsa	0.106508	0.0884741	0.166494	0.531395
Orthologous group10	ACTR10_Mmu	ACTR10_Ptr	0.108554	0.0910771	0.166666	0.546464
Orthologous group10	ACTR10_Mmu	ACTR10_Nle	0.10753	0.0897978	0.166437	0.539531
Orthologous group10	ACTR10_Mmu	ACTR10_Ppy	0.109579	0.0884741	0.180432	0.490346
Orthologous group10	ACTR10_Mmu	ACTR10_Cja	0.127227	0.0920989	0.249757	0.368754
Orthologous group10	ACTR10_Mmu	ACTR10_Ggo	0.242208	0.206464	0.370367	0.557458
Orthologous group10	ACTR10_Cja	ACTR10_Hsa	0.0286859	0.00937512	0.0916004	0.102348
Orthologous group10	ACTR10_Cja	ACTR10_Ptr	0.0314323	0.0117339	0.0957627	0.122531
Orthologous group10	ACTR10_Cja	ACTR10_Nle	0.0305157	0.0081976	0.103846	0.0789403
Orthologous group10	ACTR10_Cja	ACTR10_Ppy	0.03235	0.00702033	0.116362	0.0603319
Orthologous group10	ACTR10_Cja	ACTR10_Mmu	0.127227	0.0920989	0.249757	0.368754
Orthologous group10	ACTR10_Cja	ACTR10_Ggo	0.145076	0.114251	0.250942	0.45529
Orthologous group10	ACTR10_Ggo	ACTR10_Hsa	0.118515	0.105928	0.159681	0.663369
Orthologous group10	ACTR10_Ggo	ACTR10_Ptr	0.121653	0.108602	0.164448	0.660402
Orthologous group10	ACTR10_Ggo	ACTR10_Nle	0.130086	0.110005	0.197198	0.557843
Orthologous group10	ACTR10_Ggo	ACTR10_Ppy	0.126913	0.108636	0.187693	0.578797
Orthologous group10	ACTR10_Ggo	ACTR10_Mmu	0.242208	0.206464	0.370367	0.557458
Orthologous group10	ACTR10_Ggo	ACTR10_Cja	0.145076	0.114251	0.250942	0.45529
Orthologous group4	ACTG2_Hsa	ACTG2_Ptr	0.00358317	0	0.0150052	0
Orthologous group4	ACTG2_Hsa	ACTG2_Ggo	0.00628182	0	0.0264845	0
Orthologous group4	ACTG2_Hsa	ACTG2_Ppy	0.0135261	0.00353705	0.0460208	0.0768575
Orthologous group4	ACTG2_Hsa	ACTG2_Nle	0.0117084	0	0.0499225	0
Orthologous group4	ACTG2_Hsa	ACTC1_1_Mmu	0.0162608	0	0.0700217	0
Orthologous group4	ACTG2_Hsa	ACTG2_Cja	0.0217604	0	0.0951141	0
Orthologous group4	ACTG2_Ptr	ACTG2_Hsa	0.00358317	0	0.0150052	0
Orthologous group4	ACTG2_Ptr	ACTG2_Ggo	0.00448164	0	0.0187803	0
Orthologous group4	ACTG2_Ptr	ACTG2_Ppy	0.0117084	0.00353948	0.0380672	0.0929799
Orthologous group4	ACTG2_Ptr	ACTG2_Nle	0.0098952	0	0.041929	0
Orthologous group4	ACTG2_Ptr	ACTC1_1_Mmu	0.0144365	0	0.0617712	0
Orthologous group4	ACTG2_Ptr	ACTG2_Cja	0.0199227	0	0.0865115	0
Orthologous group4	ACTG2_Ggo	ACTG2_Hsa	0.00628182	0	0.0264845	0
Orthologous group4	ACTG2_Ggo	ACTG2_Ptr	0.00448164	0	0.0187803	0
Orthologous group4	ACTG2_Ggo	ACTG2_Ppy	0.0144365	0.00353844	0.0499225	0.0708787
Orthologous group4	ACTG2_Ggo	ACTG2_Nle	0.0126167	0	0.0538348	0
Orthologous group4	ACTG2_Ggo	ACTC1_1_Mmu	0.0171746	0	0.0740139	0
Orthologous group4	ACTG2_Ggo	ACTG2_Cja	0.0180895	0	0.0782979	0
Orthologous group4	ACTG2_Ppy	ACTG2_Hsa	0.0135261	0.00353705	0.0460208	0.0768575
Orthologous group4	ACTG2_Ppy	ACTG2_Ptr	0.0117084	0.00353948	0.0380672	0.0929799
Orthologous group4	ACTG2_Ppy	ACTG2_Ggo	0.0144365	0.00353844	0.0499225	0.0708787
Orthologous group4	ACTG2_Ppy	ACTG2_Nle	0.0162608	0.00353913	0.0578693	0.0611573
Orthologous group4	ACTG2_Ppy	ACTC1_1_Mmu	0.0245253	0.00393379	0.0934291	0.0421045
Orthologous group4	ACTG2_Ppy	ACTG2_Cja	0.0300861	0.00353705	0.120823	0.0292746
Orthologous group4	ACTG2_Nle	ACTG2_Hsa	0.0117084	0	0.0499225	0
Orthologous group4	ACTG2_Nle	ACTG2_Ptr	0.0098952	0	0.041929	0
Orthologous group4	ACTG2_Nle	ACTG2_Ggo	0.0126167	0	0.0538348	0
Orthologous group4	ACTG2_Nle	ACTG2_Ppy	0.0162608	0.00353913	0.0578693	0.0611573
Orthologous group4	ACTG2_Nle	ACTC1_1_Mmu	0.0217604	0	0.0947069	0
Orthologous group4	ACTG2_Nle	ACTG2_Cja	0.0217604	0	0.0949257	0
Orthologous group4	ACTC1_1_Mmu	ACTG2_Hsa	0.0162608	0	0.0700217	0
Orthologous group4	ACTC1_1_Mmu	ACTG2_Ptr	0.0144365	0	0.0617712	0
Orthologous group4	ACTC1_1_Mmu	ACTG2_Ggo	0.0171746	0	0.0740139	0
Orthologous group4	ACTC1_1_Mmu	ACTG2_Ppy	0.0245253	0.00393379	0.0934291	0.0421045
Orthologous group4	ACTC1_1_Mmu	ACTG2_Nle	0.0217604	0	0.0947069	0
Orthologous group4	ACTC1_1_Mmu	ACTG2_Cja	0.032882	0	0.14726	0
Orthologous group4	ACTG2_Cja	ACTG2_Hsa	0.0217604	0	0.0951141	0
Orthologous group4	ACTG2_Cja	ACTG2_Ptr	0.0199227	0	0.0865115	0
Orthologous group4	ACTG2_Cja	ACTG2_Ggo	0.0180895	0	0.0782979	0
Orthologous group4	ACTG2_Cja	ACTG2_Ppy	0.0300861	0.00353705	0.120823	0.0292746
Orthologous group4	ACTG2_Cja	ACTG2_Nle	0.0217604	0	0.0949257	0
Orthologous group4	ACTG2_Cja	ACTC1_1_Mmu	0.032882	0	0.14726	0
Orthologous group1	ACTBL2_Hsa	ACTBL2_Ptr	0.00720294	0.00118297	0.0263846	0.0448354
Orthologous group1	ACTBL2_Hsa	ACTBL2_Nle	0.0117402	0.00355732	0.0378868	0.0938933
Orthologous group1	ACTBL2_Hsa	ACTBL2_Ppy	0.016305	0.00593945	0.0496049	0.119735
Orthologous group1	ACTBL2_Hsa	ACTBL2_Mmu	0.0245924	0.00474638	0.0902164	0.0526111
Orthologous group1	ACTBL2_Hsa	ACTBL2_Cja	0.0395555	0.00951261	0.142511	0.06675
Orthologous group1	ACTBL2_Hsa	ACTBL2_Ggo	0.0126509	0.00355451	0.0418891	0.0848553
Orthologous group1	ACTBL2_Ptr	ACTBL2_Hsa	0.00720294	0.00118297	0.0263846	0.0448354
Orthologous group1	ACTBL2_Ptr	ACTBL2_Nle	0.0117402	0.00237014	0.0417565	0.0567609
Orthologous group1	ACTBL2_Ptr	ACTBL2_Ppy	0.0172213	0.00474873	0.0574994	0.0825874
Orthologous group1	ACTBL2_Ptr	ACTBL2_Mmu	0.0245924	0.00355767	0.0943342	0.0377135
Orthologous group1	ACTBL2_Ptr	ACTBL2_Cja	0.0386115	0.00831856	0.142414	0.0584111
Orthologous group1	ACTBL2_Ptr	ACTBL2_Ggo	0.0126509	0.00236827	0.0457866	0.051724
Orthologous group1	ACTBL2_Nle	ACTBL2_Hsa	0.0117402	0.00355732	0.0378868	0.0938933
Orthologous group1	ACTBL2_Nle	ACTBL2_Ptr	0.0117402	0.00237014	0.0417565	0.0567609
Orthologous group1	ACTBL2_Nle	ACTBL2_Ppy	0.0135261	0.00473748	0.0415724	0.113957
Orthologous group1	ACTBL2_Nle	ACTBL2_Mmu	0.020841	0.00354925	0.0774632	0.0458186
Orthologous group1	ACTBL2_Nle	ACTBL2_Cja	0.0347517	0.00829884	0.1242	0.0668181
Orthologous group1	ACTBL2_Nle	ACTBL2_Ggo	0.0135628	0.00474779	0.0417565	0.113702
Orthologous group1	ACTBL2_Ppy	ACTBL2_Hsa	0.016305	0.00593945	0.0496049	0.119735
Orthologous group1	ACTBL2_Ppy	ACTBL2_Ptr	0.0172213	0.00474873	0.0574994	0.0825874
Orthologous group1	ACTBL2_Ppy	ACTBL2_Nle	0.0135261	0.00473748	0.0415724	0.113957
Orthologous group1	ACTBL2_Ppy	ACTBL2_Mmu	0.0273006	0.00711679	0.093903	0.0757887
Orthologous group1	ACTBL2_Ppy	ACTBL2_Cja	0.0356883	0.010689	0.119776	0.0892419
Orthologous group1	ACTBL2_Ppy	ACTBL2_Ggo	0.019977	0.00713442	0.0614941	0.116018
Orthologous group1	ACTBL2_Mmu	ACTBL2_Hsa	0.0245924	0.00474638	0.0902164	0.0526111
Orthologous group1	ACTBL2_Mmu	ACTBL2_Ptr	0.0245924	0.00355767	0.0943342	0.0377135
Orthologous group1	ACTBL2_Mmu	ACTBL2_Nle	0.020841	0.00354925	0.0774632	0.0458186
Orthologous group1	ACTBL2_Mmu	ACTBL2_Ppy	0.0273006	0.00711679	0.093903	0.0757887
Orthologous group1	ACTBL2_Mmu	ACTBL2_Cja	0.044171	0.00949098	0.164535	0.0576836
Orthologous group1	ACTBL2_Mmu	ACTBL2_Ggo	0.0245924	0.00593886	0.0860037	0.0690536
Orthologous group1	ACTBL2_Cja	ACTBL2_Hsa	0.0395555	0.00951261	0.142511	0.06675
Orthologous group1	ACTBL2_Cja	ACTBL2_Ptr	0.0386115	0.00831856	0.142414	0.0584111
Orthologous group1	ACTBL2_Cja	ACTBL2_Nle	0.0347517	0.00829884	0.1242	0.0668181
Orthologous group1	ACTBL2_Cja	ACTBL2_Ppy	0.0356883	0.010689	0.119776	0.0892419
Orthologous group1	ACTBL2_Cja	ACTBL2_Mmu	0.044171	0.00949098	0.164535	0.0576836
Orthologous group1	ACTBL2_Cja	ACTBL2_Ggo	0.0395555	0.0107123	0.137947	0.0776557
Orthologous group1	ACTBL2_Ggo	ACTBL2_Hsa	0.0126509	0.00355451	0.0418891	0.0848553
Orthologous group1	ACTBL2_Ggo	ACTBL2_Ptr	0.0126509	0.00236827	0.0457866	0.051724
Orthologous group1	ACTBL2_Ggo	ACTBL2_Nle	0.0135628	0.00474779	0.0417565	0.113702
Orthologous group1	ACTBL2_Ggo	ACTBL2_Ppy	0.019977	0.00713442	0.0614941	0.116018
Orthologous group1	ACTBL2_Ggo	ACTBL2_Mmu	0.0245924	0.00593886	0.0860037	0.0690536
Orthologous group1	ACTBL2_Ggo	ACTBL2_Cja	0.0395555	0.0107123	0.137947	0.0776557
Orthologous group12	ACTR8_Hsa	ACTR8_Ptr	0.00462251	0	0.0203863	0
Orthologous group12	ACTR8_Hsa	ACTR8_Ppy	0.0139539	0	0.0629006	0
Orthologous group12	ACTR8_Hsa	ACTR8_Mmu	0.0202399	0	0.0925893	0
Orthologous group12	ACTR8_Hsa	ACTR8_Cja	0.0281723	0	0.131564	0
Orthologous group12	ACTR8_Hsa	ACTR8_Ggo	0.0061697	0	0.0273068	0
Orthologous group12	ACTR8_Hsa	ACTR8_Nle	0.0140191	0.00200267	0.0561009	0.0356977
Orthologous group12	ACTR8_Ptr	ACTR8_Hsa	0.00462251	0	0.0203863	0
Orthologous group12	ACTR8_Ptr	ACTR8_Ppy	0.0155205	0	0.0702267	0
Orthologous group12	ACTR8_Ptr	ACTR8_Mmu	0.0218197	0	0.100208	0
Orthologous group12	ACTR8_Ptr	ACTR8_Cja	0.0297689	0	0.139596	0
Orthologous group12	ACTR8_Ptr	ACTR8_Ggo	0.00772009	0	0.0342917	0
Orthologous group12	ACTR8_Ptr	ACTR8_Nle	0.0155931	0.00200267	0.063418	0.0315789
Orthologous group12	ACTR8_Ppy	ACTR8_Hsa	0.0139539	0	0.0629006	0
Orthologous group12	ACTR8_Ppy	ACTR8_Ptr	0.0155205	0	0.0702267	0
Orthologous group12	ACTR8_Ppy	ACTR8_Mmu	0.0218197	0	0.100208	0
Orthologous group12	ACTR8_Ppy	ACTR8_Cja	0.0265791	0	0.123616	0
Orthologous group12	ACTR8_Ppy	ACTR8_Ggo	0.0139539	0	0.0629006	0
Orthologous group12	ACTR8_Ppy	ACTR8_Nle	0.0155931	0.00200267	0.063418	0.0315789
Orthologous group12	ACTR8_Mmu	ACTR8_Hsa	0.0202399	0	0.0925893	0
Orthologous group12	ACTR8_Mmu	ACTR8_Ptr	0.0218197	0	0.100208	0
Orthologous group12	ACTR8_Mmu	ACTR8_Ppy	0.0218197	0	0.100208	0
Orthologous group12	ACTR8_Mmu	ACTR8_Cja	0.0234028	0	0.107906	0
Orthologous group12	ACTR8_Mmu	ACTR8_Ggo	0.0234028	0	0.107906	0
Orthologous group12	ACTR8_Mmu	ACTR8_Nle	0.018751	0.00200301	0.0782236	0.0256062
Orthologous group12	ACTR8_Cja	ACTR8_Hsa	0.0281723	0	0.131564	0
Orthologous group12	ACTR8_Cja	ACTR8_Ptr	0.0297689	0	0.139596	0
Orthologous group12	ACTR8_Cja	ACTR8_Ppy	0.0265791	0	0.123616	0
Orthologous group12	ACTR8_Cja	ACTR8_Mmu	0.0234028	0	0.107906	0
Orthologous group12	ACTR8_Cja	ACTR8_Ggo	0.0249893	0	0.115753	0
Orthologous group12	ACTR8_Cja	ACTR8_Nle	0.0267044	0.00200267	0.11674	0.017155
Orthologous group12	ACTR8_Ggo	ACTR8_Hsa	0.0061697	0	0.0273068	0
Orthologous group12	ACTR8_Ggo	ACTR8_Ptr	0.00772009	0	0.0342917	0
Orthologous group12	ACTR8_Ggo	ACTR8_Ppy	0.0139539	0	0.0629006	0
Orthologous group12	ACTR8_Ggo	ACTR8_Mmu	0.0234028	0	0.107906	0
Orthologous group12	ACTR8_Ggo	ACTR8_Cja	0.0249893	0	0.115753	0
Orthologous group12	ACTR8_Ggo	ACTR8_Nle	0.0171704	0.00200267	0.0708073	0.0282834
Orthologous group12	ACTR8_Nle	ACTR8_Hsa	0.0140191	0.00200267	0.0561009	0.0356977
Orthologous group12	ACTR8_Nle	ACTR8_Ptr	0.0155931	0.00200267	0.063418	0.0315789
Orthologous group12	ACTR8_Nle	ACTR8_Ppy	0.0155931	0.00200267	0.063418	0.0315789
Orthologous group12	ACTR8_Nle	ACTR8_Mmu	0.018751	0.00200301	0.0782236	0.0256062
Orthologous group12	ACTR8_Nle	ACTR8_Cja	0.0267044	0.00200267	0.11674	0.017155
Orthologous group12	ACTR8_Nle	ACTR8_Ggo	0.0171704	0.00200267	0.0708073	0.0282834
Orthologous group3	ACTC1_Hsa	ACTC1_Ptr	0.00358317	0	0.0149259	0
Orthologous group3	ACTC1_Hsa	ACTC1_Nle	0.0108013	0	0.0457284	0
Orthologous group3	ACTC1_Hsa	ACTC1_Ppy	0.00808633	0	0.0340538	0
Orthologous group3	ACTC1_Hsa	ACTC1_Mmu	0.0135261	0	0.0574627	0
Orthologous group3	ACTC1_Hsa	ACTC1_Cja	0.0254493	0	0.111167	0
Orthologous group3	ACTC1_Hsa	ACTC1_Ggo	0.00358317	0	0.0149259	0
Orthologous group3	ACTC1_Ptr	ACTC1_Hsa	0.00358317	0	0.0149259	0
Orthologous group3	ACTC1_Ptr	ACTC1_Nle	0.0108013	0	0.0457284	0
Orthologous group3	ACTC1_Ptr	ACTC1_Ppy	0.00808633	0	0.0340538	0
Orthologous group3	ACTC1_Ptr	ACTC1_Mmu	0.0135261	0	0.0574627	0
Orthologous group3	ACTC1_Ptr	ACTC1_Cja	0.0254493	0	0.111167	0
Orthologous group3	ACTC1_Ptr	ACTC1_Ggo	0.00538119	0	0.0225017	0
Orthologous group3	ACTC1_Nle	ACTC1_Hsa	0.0108013	0	0.0457284	0
Orthologous group3	ACTC1_Nle	ACTC1_Ptr	0.0108013	0	0.0457284	0
Orthologous group3	ACTC1_Nle	ACTC1_Ppy	0.0117084	0	0.0497314	0
Orthologous group3	ACTC1_Nle	ACTC1_Mmu	0.0171746	0	0.0736074	0
Orthologous group3	ACTC1_Nle	ACTC1_Cja	0.0254493	0	0.111241	0
Orthologous group3	ACTC1_Nle	ACTC1_Ggo	0.0126167	0	0.0536285	0
Orthologous group3	ACTC1_Ppy	ACTC1_Hsa	0.00808633	0	0.0340538	0
Orthologous group3	ACTC1_Ppy	ACTC1_Ptr	0.00808633	0	0.0340538	0
Orthologous group3	ACTC1_Ppy	ACTC1_Nle	0.0117084	0	0.0497314	0
Orthologous group3	ACTC1_Ppy	ACTC1_Mmu	0.0162608	0	0.0695927	0
Orthologous group3	ACTC1_Ppy	ACTC1_Cja	0.0263743	0	0.115613	0
Orthologous group3	ACTC1_Ppy	ACTC1_Ggo	0.0098952	0	0.0418359	0
Orthologous group3	ACTC1_Mmu	ACTC1_Hsa	0.0135261	0	0.0574627	0
Orthologous group3	ACTC1_Mmu	ACTC1_Ptr	0.0135261	0	0.0574627	0
Orthologous group3	ACTC1_Mmu	ACTC1_Nle	0.0171746	0	0.0736074	0
Orthologous group3	ACTC1_Mmu	ACTC1_Ppy	0.0162608	0	0.0695927	0
Orthologous group3	ACTC1_Mmu	ACTC1_Cja	0.0226809	0	0.0982436	0
Orthologous group3	ACTC1_Mmu	ACTC1_Ggo	0.0153481	0	0.0654681	0
Orthologous group3	ACTC1_Cja	ACTC1_Hsa	0.0254493	0	0.111167	0
Orthologous group3	ACTC1_Cja	ACTC1_Ptr	0.0254493	0	0.111167	0
Orthologous group3	ACTC1_Cja	ACTC1_Nle	0.0254493	0	0.111241	0
Orthologous group3	ACTC1_Cja	ACTC1_Ppy	0.0263743	0	0.115613	0
Orthologous group3	ACTC1_Cja	ACTC1_Mmu	0.0226809	0	0.0982436	0
Orthologous group3	ACTC1_Cja	ACTC1_Ggo	0.0273006	0	0.119776	0
Orthologous group3	ACTC1_Ggo	ACTC1_Hsa	0.00358317	0	0.0149259	0
Orthologous group3	ACTC1_Ggo	ACTC1_Ptr	0.00538119	0	0.0225017	0
Orthologous group3	ACTC1_Ggo	ACTC1_Nle	0.0126167	0	0.0536285	0
Orthologous group3	ACTC1_Ggo	ACTC1_Ppy	0.0098952	0	0.0418359	0
Orthologous group3	ACTC1_Ggo	ACTC1_Mmu	0.0153481	0	0.0654681	0
Orthologous group3	ACTC1_Ggo	ACTC1_Cja	0.0273006	0	0.119776	0
Orthologous group5	ACTA2_Hsa	ACTA2_PTR	0.00448164	0	0.0189404	0
Orthologous group5	ACTA2_Hsa	ACTA2_Nle	0.0171746	0	0.0746689	0
Orthologous group5	ACTA2_Hsa	ACTA2_Ppy	0.0180895	0	0.0788644	0
Orthologous group5	ACTA2_Hsa	ACTA2_Mmu	0.0199227	0	0.0871692	0
Orthologous group5	ACTA2_Hsa	ACTA2_Cja	0.0319489	0	0.143685	0
Orthologous group5	ACTA2_Hsa	ACTA2_Ggo	0.00538119	0	0.0227866	0
Orthologous group5	ACTA2_PTR	ACTA2_Hsa	0.00448164	0	0.0189404	0
Orthologous group5	ACTA2_PTR	ACTA2_Nle	0.0180895	0	0.0788126	0
Orthologous group5	ACTA2_PTR	ACTA2_Ppy	0.0190055	0	0.083034	0
Orthologous group5	ACTA2_PTR	ACTA2_Mmu	0.020841	0	0.0913827	0
Orthologous group5	ACTA2_PTR	ACTA2_Cja	0.032882	0	0.148223	0
Orthologous group5	ACTA2_PTR	ACTA2_Ggo	0.00628182	0	0.0266526	0
Orthologous group5	ACTA2_Nle	ACTA2_Hsa	0.0171746	0	0.0746689	0
Orthologous group5	ACTA2_Nle	ACTA2_PTR	0.0180895	0	0.0788126	0
Orthologous group5	ACTA2_Nle	ACTA2_Ppy	0.0153481	0	0.066493	0
Orthologous group5	ACTA2_Nle	ACTA2_Mmu	0.020841	0	0.0913827	0
Orthologous group5	ACTA2_Nle	ACTA2_Cja	0.0310169	0	0.139174	0
Orthologous group5	ACTA2_Nle	ACTA2_Ggo	0.0153481	0	0.0664497	0
Orthologous group5	ACTA2_Ppy	ACTA2_Hsa	0.0180895	0	0.0788644	0
Orthologous group5	ACTA2_Ppy	ACTA2_PTR	0.0190055	0	0.083034	0
Orthologous group5	ACTA2_Ppy	ACTA2_Nle	0.0153481	0	0.066493	0
Orthologous group5	ACTA2_Ppy	ACTA2_Mmu	0.0236026	0	0.104237	0
Orthologous group5	ACTA2_Ppy	ACTA2_Cja	0.0356883	0	0.162119	0
Orthologous group5	ACTA2_Ppy	ACTA2_Ggo	0.0162608	0	0.0705942	0
Orthologous group5	ACTA2_Mmu	ACTA2_Hsa	0.0199227	0	0.0871692	0
Orthologous group5	ACTA2_Mmu	ACTA2_PTR	0.020841	0	0.0913827	0
Orthologous group5	ACTA2_Mmu	ACTA2_Nle	0.020841	0	0.0913827	0
Orthologous group5	ACTA2_Mmu	ACTA2_Ppy	0.0236026	0	0.104237	0
Orthologous group5	ACTA2_Mmu	ACTA2_Cja	0.0300861	0	0.134689	0
Orthologous group5	ACTA2_Mmu	ACTA2_Ggo	0.0162608	0	0.0705481	0
Orthologous group5	ACTA2_Cja	ACTA2_Hsa	0.0319489	0	0.143685	0
Orthologous group5	ACTA2_Cja	ACTA2_PTR	0.032882	0	0.148223	0
Orthologous group5	ACTA2_Cja	ACTA2_Nle	0.0310169	0	0.139174	0
Orthologous group5	ACTA2_Cja	ACTA2_Ppy	0.0356883	0	0.162119	0
Orthologous group5	ACTA2_Cja	ACTA2_Mmu	0.0300861	0	0.134689	0
Orthologous group5	ACTA2_Cja	ACTA2_Ggo	0.0300861	0	0.134689	0
Orthologous group5	ACTA2_Ggo	ACTA2_Hsa	0.00538119	0	0.0227866	0
Orthologous group5	ACTA2_Ggo	ACTA2_PTR	0.00628182	0	0.0266526	0
Orthologous group5	ACTA2_Ggo	ACTA2_Nle	0.0153481	0	0.0664497	0
Orthologous group5	ACTA2_Ggo	ACTA2_Ppy	0.0162608	0	0.0705942	0
Orthologous group5	ACTA2_Ggo	ACTA2_Mmu	0.0162608	0	0.0705481	0
Orthologous group5	ACTA2_Ggo	ACTA2_Cja	0.0300861	0	0.134689	0
Orthologous group7	ACTL9_Hsa	LOC468702_Ptr	0.00546949	0.00497102	0.00684155	0.726592
Orthologous group7	ACTL9_Hsa	ACTL9_Nle	0.0324827	0.0150177	0.0826441	0.181715
Orthologous group7	ACTL9_Hsa	ACTL9_Ppy	0.0258726	0.0112257	0.0677621	0.165663
Orthologous group7	ACTL9_Hsa	ACTL9_Mmu	0.0391515	0.0149974	0.110155	0.136148
Orthologous group7	ACTL9_Hsa	ACTL9_Cja	0.0999215	0.0533008	0.247277	0.215551
Orthologous group7	ACTL9_Hsa	ACTL9_Ggo	0.00821926	0.00621508	0.0137697	0.451357
Orthologous group7	LOC468702_Ptr	ACTL9_Hsa	0.00546949	0.00497102	0.00684155	0.726592
Orthologous group7	LOC468702_Ptr	ACTL9_Nle	0.034382	0.0175428	0.0827433	0.212015
Orthologous group7	LOC468702_Ptr	ACTL9_Ppy	0.0296426	0.0137375	0.0753546	0.182305
Orthologous group7	LOC468702_Ptr	ACTL9_Mmu	0.0410678	0.017519	0.11029	0.158845
Orthologous group7	LOC468702_Ptr	ACTL9_Cja	0.104084	0.0559332	0.257241	0.217435
Orthologous group7	LOC468702_Ptr	ACTL9_Ggo	0.0119014	0.00871198	0.0207746	0.419358
Orthologous group7	ACTL9_Nle	ACTL9_Hsa	0.0324827	0.0150177	0.0826441	0.181715
Orthologous group7	ACTL9_Nle	LOC468702_Ptr	0.034382	0.0175428	0.0827433	0.212015
Orthologous group7	ACTL9_Nle	ACTL9_Ppy	0.03724	0.0200723	0.0866869	0.231549
Orthologous group7	ACTL9_Nle	ACTL9_Mmu	0.0439515	0.0219704	0.108213	0.203029
Orthologous group7	ACTL9_Nle	ACTL9_Cja	0.106174	0.0579492	0.259401	0.223396
Orthologous group7	ACTL9_Nle	ACTL9_Ggo	0.0353335	0.0162659	0.090553	0.179628
Orthologous group7	ACTL9_Ppy	ACTL9_Hsa	0.0258726	0.0112257	0.0677621	0.165663
Orthologous group7	ACTL9_Ppy	LOC468702_Ptr	0.0296426	0.0137375	0.0753546	0.182305
Orthologous group7	ACTL9_Ppy	ACTL9_Nle	0.03724	0.0200723	0.0866869	0.231549
Orthologous group7	ACTL9_Ppy	ACTL9_Mmu	0.0410678	0.0213158	0.0986522	0.21607
Orthologous group7	ACTL9_Ppy	ACTL9_Cja	0.103041	0.0572336	0.248034	0.230749
Orthologous group7	ACTL9_Ppy	ACTL9_Ggo	0.0305881	0.0124704	0.0830924	0.150079
Orthologous group7	ACTL9_Mmu	ACTL9_Hsa	0.0391515	0.0149974	0.110155	0.136148
Orthologous group7	ACTL9_Mmu	LOC468702_Ptr	0.0410678	0.017519	0.11029	0.158845
Orthologous group7	ACTL9_Mmu	ACTL9_Nle	0.0439515	0.0219704	0.108213	0.203029
Orthologous group7	ACTL9_Mmu	ACTL9_Ppy	0.0410678	0.0213158	0.0986522	0.21607
Orthologous group7	ACTL9_Mmu	ACTL9_Cja	0.10096	0.0536627	0.251665	0.213231
Orthologous group7	ACTL9_Mmu	ACTL9_Ggo	0.0420278	0.0162439	0.118472	0.137111
Orthologous group7	ACTL9_Cja	ACTL9_Hsa	0.0999215	0.0533008	0.247277	0.215551
Orthologous group7	ACTL9_Cja	LOC468702_Ptr	0.104084	0.0559332	0.257241	0.217435
Orthologous group7	ACTL9_Cja	ACTL9_Nle	0.106174	0.0579492	0.259401	0.223396
Orthologous group7	ACTL9_Cja	ACTL9_Ppy	0.103041	0.0572336	0.248034	0.230749
Orthologous group7	ACTL9_Cja	ACTL9_Mmu	0.10096	0.0536627	0.251665	0.213231
Orthologous group7	ACTL9_Cja	ACTL9_Ggo	0.0988845	0.053244	0.243339	0.218806
Orthologous group7	ACTL9_Ggo	ACTL9_Hsa	0.00821926	0.00621508	0.0137697	0.451357
Orthologous group7	ACTL9_Ggo	LOC468702_Ptr	0.0119014	0.00871198	0.0207746	0.419358
Orthologous group7	ACTL9_Ggo	ACTL9_Nle	0.0353335	0.0162659	0.090553	0.179628
Orthologous group7	ACTL9_Ggo	ACTL9_Ppy	0.0305881	0.0124704	0.0830924	0.150079
Orthologous group7	ACTL9_Ggo	ACTL9_Mmu	0.0420278	0.0162439	0.118472	0.137111
Orthologous group7	ACTL9_Ggo	ACTL9_Cja	0.0988845	0.053244	0.243339	0.218806
Orthologous group8	ACTL10_Hsa	ACTL10_Ptr	0.0042493	0	0.0159228	0
Orthologous group8	ACTL10_Hsa	ACTL10_Nle	0.014259	0.0106781	0.0241632	0.441915
Orthologous group8	ACTL10_Hsa	ACTL10_Ppy	0.0156999	0.00774325	0.0380344	0.203585
Orthologous group8	ACTL10_Hsa	ACTL10_Mmu	0.0346883	0.0176047	0.0830724	0.21192
Orthologous group8	ACTL10_Hsa	LOC100403536_Cja	0.071059	0.0339843	0.181426	0.187317
Orthologous group8	ACTL10_Hsa	ACTL10_Ggo	0.00852282	0.00193486	0.026717	0.0724206
Orthologous group8	ACTL10_Ptr	ACTL10_Hsa	0.0042493	0	0.0159228	0
Orthologous group8	ACTL10_Ptr	ACTL10_Nle	0.0156999	0.0106798	0.0296268	0.360477
Orthologous group8	ACTL10_Ptr	ACTL10_Ppy	0.014259	0.0077445	0.0324667	0.238536
Orthologous group8	ACTL10_Ptr	ACTL10_Mmu	0.0346883	0.0176076	0.083034	0.212053
Orthologous group8	ACTL10_Ptr	LOC100403536_Cja	0.0695078	0.0339899	0.174713	0.194547
Orthologous group8	ACTL10_Ptr	ACTL10_Ggo	0.00709561	0.00193517	0.0212875	0.0909067
Orthologous group8	ACTL10_Nle	ACTL10_Hsa	0.014259	0.0106781	0.0241632	0.441915
Orthologous group8	ACTL10_Nle	ACTL10_Ptr	0.0156999	0.0106798	0.0296268	0.360477
Orthologous group8	ACTL10_Nle	ACTL10_Ppy	0.0214914	0.0145541	0.0410687	0.354386
Orthologous group8	ACTL10_Nle	ACTL10_Mmu	0.0391393	0.0205358	0.0924677	0.222087
Orthologous group8	ACTL10_Nle	LOC100403536_Cja	0.071059	0.0325655	0.187079	0.174074
Orthologous group8	ACTL10_Nle	ACTL10_Ggo	0.0200394	0.0126401	0.0406787	0.310729
Orthologous group8	ACTL10_Ppy	ACTL10_Hsa	0.0156999	0.00774325	0.0380344	0.203585
Orthologous group8	ACTL10_Ppy	ACTL10_Ptr	0.014259	0.0077445	0.0324667	0.238536
Orthologous group8	ACTL10_Ppy	ACTL10_Nle	0.0214914	0.0145541	0.0410687	0.354386
Orthologous group8	ACTL10_Ppy	ACTL10_Mmu	0.0406289	0.0215068	0.0957249	0.224674
Orthologous group8	ACTL10_Ppy	LOC100403536_Cja	0.0741711	0.0365745	0.187639	0.194919
Orthologous group8	ACTL10_Ppy	ACTL10_Ggo	0.0185901	0.00969475	0.0435892	0.222412
Orthologous group8	ACTL10_Mmu	ACTL10_Hsa	0.0346883	0.0176047	0.0830724	0.21192
Orthologous group8	ACTL10_Mmu	ACTL10_Ptr	0.0346883	0.0176076	0.083034	0.212053
Orthologous group8	ACTL10_Mmu	ACTL10_Nle	0.0391393	0.0205358	0.0924677	0.222087
Orthologous group8	ACTL10_Mmu	ACTL10_Ppy	0.0406289	0.0215068	0.0957249	0.224674
Orthologous group8	ACTL10_Mmu	LOC100403536_Cja	0.0804341	0.0387568	0.205725	0.188391
Orthologous group8	ACTL10_Mmu	ACTL10_Ggo	0.0391393	0.019593	0.0947895	0.206699
Orthologous group8	LOC100403536_Cja	ACTL10_Hsa	0.071059	0.0339843	0.181426	0.187317
Orthologous group8	LOC100403536_Cja	ACTL10_Ptr	0.0695078	0.0339899	0.174713	0.194547
Orthologous group8	LOC100403536_Cja	ACTL10_Nle	0.071059	0.0325655	0.187079	0.174074
Orthologous group8	LOC100403536_Cja	ACTL10_Ppy	0.0741711	0.0365745	0.187639	0.194919
Orthologous group8	LOC100403536_Cja	ACTL10_Mmu	0.0804341	0.0387568	0.205725	0.188391
Orthologous group8	LOC100403536_Cja	ACTL10_Ggo	0.0741711	0.0360241	0.187927	0.191692
Orthologous group8	ACTL10_Ggo	ACTL10_Hsa	0.00852282	0.00193486	0.026717	0.0724206
Orthologous group8	ACTL10_Ggo	ACTL10_Ptr	0.00709561	0.00193517	0.0212875	0.0909067
Orthologous group8	ACTL10_Ggo	ACTL10_Nle	0.0200394	0.0126401	0.0406787	0.310729
Orthologous group8	ACTL10_Ggo	ACTL10_Ppy	0.0185901	0.00969475	0.0435892	0.222412
Orthologous group8	ACTL10_Ggo	ACTL10_Mmu	0.0391393	0.019593	0.0947895	0.206699
Orthologous group8	ACTL10_Ggo	LOC100403536_Cja	0.0741711	0.0360241	0.187927	0.191692
Orthologous group6	ACTL8_Hsa	ACTL8_Ptr	0.00464398	0.0012285	0.0152289	0.0806688
Orthologous group6	ACTL8_Hsa	ACTL8_Nle	0.0207104	0.00866168	0.0590469	0.146692
Orthologous group6	ACTL8_Hsa	ACTL8_Ppy	0.013113	0.00370143	0.0427854	0.0865114
Orthologous group6	ACTL8_Hsa	ACTL8_Mmu	0.0293505	0.0105287	0.090471	0.116376
Orthologous group6	ACTL8_Hsa	ACTL8_Cja	0.0751359	0.037095	0.207613	0.178674
Orthologous group6	ACTL8_Hsa	ACTL8_Ggo	0.0140191	0.00369232	0.0466169	0.0792054
Orthologous group6	ACTL8_Ptr	ACTL8_Hsa	0.00464398	0.0012285	0.0152289	0.0806688
Orthologous group6	ACTL8_Ptr	ACTL8_Nle	0.0235794	0.0099134	0.0671501	0.147631
Orthologous group6	ACTL8_Ptr	ACTL8_Ppy	0.0140585	0.00494236	0.0427023	0.11574
Orthologous group6	ACTL8_Ptr	ACTL8_Mmu	0.0332228	0.0117844	0.103193	0.114198
Orthologous group6	ACTL8_Ptr	ACTL8_Cja	0.0782213	0.0384094	0.217271	0.176781
Orthologous group6	ACTL8_Ptr	ACTL8_Ggo	0.0168546	0.00493017	0.0545695	0.0903467
Orthologous group6	ACTL8_Nle	ACTL8_Hsa	0.0207104	0.00866168	0.0590469	0.146692
Orthologous group6	ACTL8_Nle	ACTL8_Ptr	0.0235794	0.0099134	0.0671501	0.147631
Orthologous group6	ACTL8_Nle	ACTL8_Ppy	0.0188039	0.0061805	0.0589308	0.104877
Orthologous group6	ACTL8_Nle	ACTL8_Mmu	0.0283856	0.0105308	0.086152	0.122236
Orthologous group6	ACTL8_Nle	ACTL8_Cja	0.0702267	0.0339788	0.195697	0.173629
Orthologous group6	ACTL8_Nle	ACTL8_Ggo	0.0274219	0.0111642	0.0795975	0.140258
Orthologous group6	ACTL8_Ppy	ACTL8_Hsa	0.013113	0.00370143	0.0427854	0.0865114
Orthologous group6	ACTL8_Ppy	ACTL8_Ptr	0.0140585	0.00494236	0.0427023	0.11574
Orthologous group6	ACTL8_Ppy	ACTL8_Nle	0.0188039	0.0061805	0.0589308	0.104877
Orthologous group6	ACTL8_Ppy	ACTL8_Mmu	0.0264594	0.00679996	0.0902892	0.0753131
Orthologous group6	ACTL8_Ppy	ACTL8_Cja	0.0712499	0.0327062	0.2054	0.159231
Orthologous group6	ACTL8_Ppy	ACTL8_Ggo	0.0159531	0.00494338	0.0507016	0.0974995
Orthologous group6	ACTL8_Mmu	ACTL8_Hsa	0.0293505	0.0105287	0.090471	0.116376
Orthologous group6	ACTL8_Mmu	ACTL8_Ptr	0.0332228	0.0117844	0.103193	0.114198
Orthologous group6	ACTL8_Mmu	ACTL8_Nle	0.0283856	0.0105308	0.086152	0.122236
Orthologous group6	ACTL8_Mmu	ACTL8_Ppy	0.0264594	0.00679996	0.0902892	0.0753131
Orthologous group6	ACTL8_Mmu	ACTL8_Cja	0.0722745	0.0371964	0.193358	0.192371
Orthologous group6	ACTL8_Mmu	ACTL8_Ggo	0.0332228	0.0117868	0.103123	0.114299
Orthologous group6	ACTL8_Cja	ACTL8_Hsa	0.0751359	0.037095	0.207613	0.178674
Orthologous group6	ACTL8_Cja	ACTL8_Ptr	0.0782213	0.0384094	0.217271	0.176781
Orthologous group6	ACTL8_Cja	ACTL8_Nle	0.0702267	0.0339788	0.195697	0.173629
Orthologous group6	ACTL8_Cja	ACTL8_Ppy	0.0712499	0.0327062	0.2054	0.159231
Orthologous group6	ACTL8_Cja	ACTL8_Mmu	0.0722745	0.0371964	0.193358	0.192371
Orthologous group6	ACTL8_Cja	ACTL8_Ggo	0.073086	0.0377715	0.194563	0.194135
Orthologous group6	ACTL8_Ggo	ACTL8_Hsa	0.0140191	0.00369232	0.0466169	0.0792054
Orthologous group6	ACTL8_Ggo	ACTL8_Ptr	0.0168546	0.00493017	0.0545695	0.0903467
Orthologous group6	ACTL8_Ggo	ACTL8_Nle	0.0274219	0.0111642	0.0795975	0.140258
Orthologous group6	ACTL8_Ggo	ACTL8_Ppy	0.0159531	0.00494338	0.0507016	0.0974995
Orthologous group6	ACTL8_Ggo	ACTL8_Mmu	0.0332228	0.0117868	0.103123	0.114299
Orthologous group6	ACTL8_Ggo	ACTL8_Cja	0.073086	0.0377715	0.194563	0.194135
Orthologous group13	ACTL6B_Hsa	ACTL6B_Ptr	0.00480002	0	0.0202146	0
Orthologous group13	ACTL6B_Hsa	ACTL6B_Nle	0.016121	0.00210029	0.0624458	0.0336338
Orthologous group13	ACTL6B_Hsa	ACTL6B_Ppy	0.0126668	0	0.0551095	0
Orthologous group13	ACTL6B_Hsa	ACTL6B_Mmu	0.019536	0	0.0839198	0
Orthologous group13	ACTL6B_Hsa	ACTL6B_Cja	0.0342637	0	0.154722	0
Orthologous group13	ACTL6B_Hsa	ACTL6B_Ggo	0.00560301	0	0.0236373	0
Orthologous group13	ACTL6B_Ptr	ACTL6B_Hsa	0.00480002	0	0.0202146	0
Orthologous group13	ACTL6B_Ptr	ACTL6B_Nle	0.0144932	0.00210029	0.055245	0.0380178
Orthologous group13	ACTL6B_Ptr	ACTL6B_Ppy	0.0116848	0	0.0507236	0
Orthologous group13	ACTL6B_Ptr	ACTL6B_Mmu	0.0176533	0	0.0755104	0
Orthologous group13	ACTL6B_Ptr	ACTL6B_Cja	0.0342637	0	0.154722	0
Orthologous group13	ACTL6B_Ptr	ACTL6B_Ggo	0.00399788	0	0.0168074	0
Orthologous group13	ACTL6B_Nle	ACTL6B_Hsa	0.016121	0.00210029	0.0624458	0.0336338
Orthologous group13	ACTL6B_Nle	ACTL6B_Ptr	0.0144932	0.00210029	0.055245	0.0380178
Orthologous group13	ACTL6B_Nle	ACTL6B_Ppy	0.0215631	0.00316824	0.0844133	0.0375324
Orthologous group13	ACTL6B_Nle	ACTL6B_Mmu	0.0233155	0.00242841	0.0925797	0.0262305
Orthologous group13	ACTL6B_Nle	ACTL6B_Cja	0.035935	0.00262513	0.152914	0.0171674
Orthologous group13	ACTL6B_Nle	ACTL6B_Ggo	0.0144932	0.00210029	0.055245	0.0380178
Orthologous group13	ACTL6B_Ppy	ACTL6B_Hsa	0.0126668	0	0.0551095	0
Orthologous group13	ACTL6B_Ppy	ACTL6B_Ptr	0.0116848	0	0.0507236	0
Orthologous group13	ACTL6B_Ppy	ACTL6B_Nle	0.0215631	0.00316824	0.0844133	0.0375324
Orthologous group13	ACTL6B_Ppy	ACTL6B_Mmu	0.026914	0	0.119423	0
Orthologous group13	ACTL6B_Ppy	ACTL6B_Cja	0.0376441	0	0.174564	0
Orthologous group13	ACTL6B_Ppy	ACTL6B_Ggo	0.0116848	0	0.0507236	0
Orthologous group13	ACTL6B_Mmu	ACTL6B_Hsa	0.019536	0	0.0839198	0
Orthologous group13	ACTL6B_Mmu	ACTL6B_Ptr	0.0176533	0	0.0755104	0
Orthologous group13	ACTL6B_Mmu	ACTL6B_Nle	0.0233155	0.00242841	0.0925797	0.0262305
Orthologous group13	ACTL6B_Mmu	ACTL6B_Ppy	0.026914	0	0.119423	0
Orthologous group13	ACTL6B_Mmu	ACTL6B_Cja	0.0386271	0	0.173831	0
Orthologous group13	ACTL6B_Mmu	ACTL6B_Ggo	0.0167138	0	0.0713409	0
Orthologous group13	ACTL6B_Cja	ACTL6B_Hsa	0.0342637	0	0.154722	0
Orthologous group13	ACTL6B_Cja	ACTL6B_Ptr	0.0342637	0	0.154722	0
Orthologous group13	ACTL6B_Cja	ACTL6B_Nle	0.035935	0.00262513	0.152914	0.0171674
Orthologous group13	ACTL6B_Cja	ACTL6B_Ppy	0.0376441	0	0.174564	0
Orthologous group13	ACTL6B_Cja	ACTL6B_Mmu	0.0386271	0	0.173831	0
Orthologous group13	ACTL6B_Cja	ACTL6B_Ggo	0.0325961	0	0.146584	0
Orthologous group13	ACTL6B_Ggo	ACTL6B_Hsa	0.00560301	0	0.0236373	0
Orthologous group13	ACTL6B_Ggo	ACTL6B_Ptr	0.00399788	0	0.0168074	0
Orthologous group13	ACTL6B_Ggo	ACTL6B_Nle	0.0144932	0.00210029	0.055245	0.0380178
Orthologous group13	ACTL6B_Ggo	ACTL6B_Ppy	0.0116848	0	0.0507236	0
Orthologous group13	ACTL6B_Ggo	ACTL6B_Mmu	0.0167138	0	0.0713409	0
Orthologous group13	ACTL6B_Ggo	ACTL6B_Cja	0.0325961	0	0.146584	0
Orthologous group14	ACTL6A_Hsa	ACTL6A_Ptr	0.00237907	0	0.0105019	0
Orthologous group14	ACTL6A_Hsa	ACTL6A_Nle	0.00715996	0.00205163	0.0248103	0.0826929
Orthologous group14	ACTL6A_Hsa	ACTL6A_Ppy	0.00810819	0	0.0365678	0
Orthologous group14	ACTL6A_Hsa	MMU.12425	0.0103642	0	0.0465543	0
Orthologous group14	ACTL6A_Hsa	ACTL6A_Cja	0.0292363	0	0.138823	0
Orthologous group14	ACTL6A_Hsa	ACTL6A_Ggo	0.00317377	0	0.0140355	0
Orthologous group14	ACTL6A_Ptr	ACTL6A_Hsa	0.00237907	0	0.0105019	0
Orthologous group14	ACTL6A_Ptr	ACTL6A_Nle	0.0047657	0.00205163	0.0140767	0.145747
Orthologous group14	ACTL6A_Ptr	ACTL6A_Ppy	0.00539571	0	0.0241794	0
Orthologous group14	ACTL6A_Ptr	MMU.12425	0.00795975	0	0.0355517	0
Orthologous group14	ACTL6A_Ptr	ACTL6A_Cja	0.0264465	0	0.124661	0
Orthologous group14	ACTL6A_Ptr	ACTL6A_Ggo	0.000792184	0	0.00348433	0
Orthologous group14	ACTL6A_Nle	ACTL6A_Hsa	0.00715996	0.00205163	0.0248103	0.0826929
Orthologous group14	ACTL6A_Nle	ACTL6A_Ptr	0.0047657	0.00205163	0.0140767	0.145747
Orthologous group14	ACTL6A_Nle	ACTL6A_Ppy	0.00720294	0.00115808	0.0283243	0.0408863
Orthologous group14	ACTL6A_Nle	MMU.12425	0.0111674	0.00205234	0.0429968	0.0477322
Orthologous group14	ACTL6A_Nle	ACTL6A_Cja	0.0283052	0.00115853	0.129539	0.00894347
Orthologous group14	ACTL6A_Nle	ACTL6A_Ggo	0.00396931	0.00205163	0.0105326	0.194788
Orthologous group14	ACTL6A_Ppy	ACTL6A_Hsa	0.00810819	0	0.0365678	0
Orthologous group14	ACTL6A_Ppy	ACTL6A_Ptr	0.00539571	0	0.0241794	0
Orthologous group14	ACTL6A_Ppy	ACTL6A_Nle	0.00720294	0.00115808	0.0283243	0.0408863
Orthologous group14	ACTL6A_Ppy	MMU.12425	0.0126509	0	0.057602	0
Orthologous group14	ACTL6A_Ppy	ACTL6A_Cja	0.0301686	0	0.143604	0
Orthologous group14	ACTL6A_Ppy	ACTL6A_Ggo	0.00449372	0	0.020095	0
Orthologous group14	MMU.12425	ACTL6A_Hsa	0.0103642	0	0.0465543	0
Orthologous group14	MMU.12425	ACTL6A_Ptr	0.00795975	0	0.0355517	0
Orthologous group14	MMU.12425	ACTL6A_Nle	0.0111674	0.00205234	0.0429968	0.0477322
Orthologous group14	MMU.12425	ACTL6A_Ppy	0.0126509	0	0.057602	0
Orthologous group14	MMU.12425	ACTL6A_Cja	0.0264465	0	0.124482	0
Orthologous group14	MMU.12425	ACTL6A_Ggo	0.00715996	0	0.0319197	0
Orthologous group14	ACTL6A_Cja	ACTL6A_Hsa	0.0292363	0	0.138823	0
Orthologous group14	ACTL6A_Cja	ACTL6A_Ptr	0.0264465	0	0.124661	0
Orthologous group14	ACTL6A_Cja	ACTL6A_Nle	0.0283052	0.00115853	0.129539	0.00894347
Orthologous group14	ACTL6A_Cja	ACTL6A_Ppy	0.0301686	0	0.143604	0
Orthologous group14	ACTL6A_Cja	MMU.12425	0.0264465	0	0.124482	0
Orthologous group14	ACTL6A_Cja	ACTL6A_Ggo	0.0255189	0	0.119999	0
Orthologous group14	ACTL6A_Ggo	ACTL6A_Hsa	0.00317377	0	0.0140355	0
Orthologous group14	ACTL6A_Ggo	ACTL6A_Ptr	0.000792184	0	0.00348433	0
Orthologous group14	ACTL6A_Ggo	ACTL6A_Nle	0.00396931	0.00205163	0.0105326	0.194788
Orthologous group14	ACTL6A_Ggo	ACTL6A_Ppy	0.00449372	0	0.020095	0
Orthologous group14	ACTL6A_Ggo	MMU.12425	0.00715996	0	0.0319197	0
Orthologous group14	ACTL6A_Ggo	ACTL6A_Cja	0.0255189	0	0.119999	0
Orthologous group11	ACTR3_Hsa	ACTR3_Ptr	0.00355451	0	0.0153852	0
Orthologous group11	ACTR3_Hsa	ACTR3_Nle	0.0053381	0	0.0231977	0
Orthologous group11	ACTR3_Hsa	ACTR3_Ppy	0.00177515	0	0.00765313	0
Orthologous group11	ACTR3_Hsa	ACTR3_Mmu	0.00716423	0	0.0313362	0
Orthologous group11	ACTR3_Hsa	ACTR3_Cja	0.0161297	0	0.0718634	0
Orthologous group11	ACTR3_Hsa	LOC101144040_GGO	0	0	0	0
Orthologous group11	ACTR3_Ptr	ACTR3_Hsa	0.00355451	0	0.0153852	0
Orthologous group11	ACTR3_Ptr	ACTR3_Nle	0.00891806	0	0.0390713	0
Orthologous group11	ACTR3_Ptr	ACTR3_Ppy	0.0053381	0	0.0231977	0
Orthologous group11	ACTR3_Ptr	ACTR3_Mmu	0.0107722	0	0.0475093	0
Orthologous group11	ACTR3_Ptr	ACTR3_Cja	0.0197616	0	0.0888133	0
Orthologous group11	ACTR3_Ptr	LOC101144040_GGO	0.00355451	0	0.0153852	0
Orthologous group11	ACTR3_Nle	ACTR3_Hsa	0.0053381	0	0.0231977	0
Orthologous group11	ACTR3_Nle	ACTR3_Ptr	0.00891806	0	0.0390713	0
Orthologous group11	ACTR3_Nle	ACTR3_Ppy	0.00712594	0	0.0310925	0
Orthologous group11	ACTR3_Nle	ACTR3_Mmu	0.0125827	0	0.0557285	0
Orthologous group11	ACTR3_Nle	ACTR3_Cja	0.0215842	0	0.0974341	0
Orthologous group11	ACTR3_Nle	LOC101144040_GGO	0.0053381	0	0.0231977	0
Orthologous group11	ACTR3_Ppy	ACTR3_Hsa	0.00177515	0	0.00765313	0
Orthologous group11	ACTR3_Ppy	ACTR3_Ptr	0.0053381	0	0.0231977	0
Orthologous group11	ACTR3_Ppy	ACTR3_Nle	0.00712594	0	0.0310925	0
Orthologous group11	ACTR3_Ppy	ACTR3_Mmu	0.00896604	0	0.0393791	0
Orthologous group11	ACTR3_Ppy	ACTR3_Cja	0.0143202	0	0.06353	0
Orthologous group11	ACTR3_Ppy	LOC101144040_GGO	0.00177515	0	0.00765313	0
Orthologous group11	ACTR3_Mmu	ACTR3_Hsa	0.00716423	0	0.0313362	0
Orthologous group11	ACTR3_Mmu	ACTR3_Ptr	0.0107722	0	0.0475093	0
Orthologous group11	ACTR3_Mmu	ACTR3_Nle	0.0125827	0	0.0557285	0
Orthologous group11	ACTR3_Mmu	ACTR3_Ppy	0.00896604	0	0.0393791	0
Orthologous group11	ACTR3_Mmu	ACTR3_Cja	0.0198687	0	0.0895371	0
Orthologous group11	ACTR3_Mmu	LOC101144040_GGO	0.00716423	0	0.0313362	0
Orthologous group11	ACTR3_Cja	ACTR3_Hsa	0.0161297	0	0.0718634	0
Orthologous group11	ACTR3_Cja	ACTR3_Ptr	0.0197616	0	0.0888133	0
Orthologous group11	ACTR3_Cja	ACTR3_Nle	0.0215842	0	0.0974341	0
Orthologous group11	ACTR3_Cja	ACTR3_Ppy	0.0143202	0	0.06353	0
Orthologous group11	ACTR3_Cja	ACTR3_Mmu	0.0198687	0	0.0895371	0
Orthologous group11	ACTR3_Cja	LOC101144040_GGO	0.0161297	0	0.0718634	0
Orthologous group11	LOC101144040_GGO	ACTR3_Hsa	0	0	0	0
Orthologous group11	LOC101144040_GGO	ACTR3_Ptr	0.00355451	0	0.0153852	0
Orthologous group11	LOC101144040_GGO	ACTR3_Nle	0.0053381	0	0.0231977	0
Orthologous group11	LOC101144040_GGO	ACTR3_Ppy	0.00177515	0	0.00765313	0
Orthologous group11	LOC101144040_GGO	ACTR3_Mmu	0.00716423	0	0.0313362	0
Orthologous group11	LOC101144040_GGO	ACTR3_Cja	0.0161297	0	0.0718634	0

## Sheet: TableS3
Supplemental table3. Information of location and strand on the chromosome for each pseudogene identified in the seven species
Species	Chromosome/accession	Start	End	Strand
Callithrix jacchus	1	16834920	16836174	Plus
Callithrix jacchus	1	79724838	79726017	Plus
Callithrix jacchus	1	108382174	108383281	Minus
Callithrix jacchus	1	143878992	143880089	Plus
Callithrix jacchus	1	144661507	144662709	Plus
Callithrix jacchus	1	152293352	152294582	Minus
Callithrix jacchus	1	201754339	201754855	Minus
Callithrix jacchus	2	48609382	48610207	Plus
Callithrix jacchus	2	73928264	73929611	Plus
Callithrix jacchus	2	109434293	109435414	Minus
Callithrix jacchus	2	117643299	117644283	Minus
Callithrix jacchus	2	127896725	127897405	Plus
Callithrix jacchus	2	145613607	145614664	Plus
Callithrix jacchus	2	162736826	162737392	Plus
Callithrix jacchus	2	187987540	187988092	Minus
Callithrix jacchus	3	26864383	26865508	Minus
Callithrix jacchus	3	49595808	49596937	Plus
Callithrix jacchus	3	188885899	188887010	Plus
Callithrix jacchus	4	3814204	3815870	Minus
Callithrix jacchus	4	47604569	47605672	Plus
Callithrix jacchus	4	98822582	98823709	Minus
Callithrix jacchus	5	7055754	7056766	Plus
Callithrix jacchus	5	69446710	69447833	Minus
Callithrix jacchus	5	155071000	155072125	Minus
Callithrix jacchus	6	17094027	17095146	Minus
Callithrix jacchus	6	22408777	22409895	Minus
Callithrix jacchus	6	34703453	34704347	Plus
Callithrix jacchus	7	97686766	97687808	Plus
Callithrix jacchus	7	113560121	113561117	Plus
Callithrix jacchus	7	127226179	127227313	Plus
Callithrix jacchus	7	132609523	132610646	Minus
Callithrix jacchus	8	59974283	59975393	Plus
Callithrix jacchus	8	86715269	86716395	Plus
Callithrix jacchus	9	37679136	37680238	Plus
Callithrix jacchus	9	46503922	46505048	Plus
Callithrix jacchus	9	52869463	52870613	Minus
Callithrix jacchus	9	103820082	103821157	Minus
Callithrix jacchus	10	9843648	9844773	Plus
Callithrix jacchus	10	15778657	15779782	Minus
Callithrix jacchus	10	18323763	18324710	Minus
Callithrix jacchus	10	21076857	21078275	Minus
Callithrix jacchus	10	21413189	21414298	Minus
Callithrix jacchus	12	2952241	2953311	Minus
Callithrix jacchus	12	55128819	55129597	Minus
Callithrix jacchus	13	44999894	45001010	Plus
Callithrix jacchus	13	100369125	100370559	Plus
Callithrix jacchus	14	49544987	49546015	Minus
Callithrix jacchus	15	2491585	2492584	Plus
Callithrix jacchus	15	64010354	64011328	Plus
Callithrix jacchus	15	75163794	75164995	Minus
Callithrix jacchus	15	79032848	79033973	Plus
Callithrix jacchus	15	95657673	95658541	Minus
Callithrix jacchus	16	24183275	24184282	Minus
Callithrix jacchus	16	71240231	71241367	Minus
Callithrix jacchus	17	24181562	24182668	Plus
Callithrix jacchus	19	24558065	24558570	Plus
Callithrix jacchus	20	3733146	3733699	Minus
Callithrix jacchus	20	27047551	27048098	Minus
Callithrix jacchus	21	44987156	44988178	Plus
Callithrix jacchus	X	45232714	45233683	Minus
Callithrix jacchus	X	47967456	47968070	Minus
Callithrix jacchus	X	115908731	115909235	Minus
Callithrix jacchus	X	115996370	115997242	Minus
Gorilla gorilla	1	28290718	28291187	Plus
Gorilla gorilla	1	80049950	80050949	Minus
Gorilla gorilla	1	94666163	94667270	Minus
Gorilla gorilla	1	106353069	106354189	Plus
Gorilla gorilla	1	182859666	182860298	Plus
Gorilla gorilla	1	204303854	204304987	Minus
Gorilla gorilla	1	218251613	218252359	Plus
Gorilla gorilla	3	12408214	12409354	Plus
Gorilla gorilla	3	139701561	139702693	Plus
Gorilla gorilla	3	139702757	139703549	Plus
Gorilla gorilla	3	177100197	177101081	Minus
Gorilla gorilla	5	62396252	62397128	Minus
Gorilla gorilla	5	115024228	115025176	Minus
Gorilla gorilla	6	47630411	47631533	Plus
Gorilla gorilla	6	88345673	88346726	Minus
Gorilla gorilla	6	101303342	101304250	Minus
Gorilla gorilla	8	83466394	83467497	Plus
Gorilla gorilla	9	6933213	6934347	Plus
Gorilla gorilla	9	82869336	82870468	Plus
Gorilla gorilla	10	75096809	75211418	Plus
Gorilla gorilla	10	81494952	81496035	Plus
Gorilla gorilla	15	12782623	12783638	Minus
Gorilla gorilla	15	22712140	22713271	Minus
Gorilla gorilla	16	39758416	39758977	Minus
Gorilla gorilla	16	39758988	39759486	Minus
Gorilla gorilla	17	17338619	17339733	Plus
Gorilla gorilla	17	19921820	19922945	Minus
Gorilla gorilla	17	35181084	35182160	Plus
Gorilla gorilla	17	78448708	78449831	Minus
Gorilla gorilla	18	60619779	60620950	Plus
Gorilla gorilla	19	9711097	9712244	Plus
Gorilla gorilla	19	20663596	20665291	Plus
Gorilla gorilla	20	1175129	1176215	Plus
Gorilla gorilla	22	8654866	8656033	Plus
Gorilla gorilla	22	25415980	25417064	Minus
Gorilla gorilla	2A	58859456	58860522	Plus
Gorilla gorilla	2A	91797470	91798356	Plus
Gorilla gorilla	2A	108008912	108010014	Plus
Gorilla gorilla	X	47032365	47033487	Minus
Gorilla gorilla	X	65922546	65923761	Plus
Gorilla gorilla	X	125532494	125533620	Minus
Homo sapiens	1	27651817	27652329	Plus
Homo sapiens	1	78239550	78240549	Minus
Homo sapiens	1	92694528	92694992	Minus
Homo sapiens	1	104112175	104113338	Plus
Homo sapiens	1	202842422	202843048	Plus
Homo sapiens	1	224051421	224052561	Minus
Homo sapiens	1	238090126	238090904	Plus
Homo sapiens	2	57992124	57993191	Plus
Homo sapiens	2	92128867	92130069	Plus
Homo sapiens	2	110941634	110942758	Plus
Homo sapiens	2	132383509	132384839	Plus
Homo sapiens	3	12111720	12112863	Plus
Homo sapiens	3	49910777	49914738	Minus
Homo sapiens	3	139212652	139213828	Plus
Homo sapiens	3	175695281	175696167	Minus
Homo sapiens	3	180538324	180539408	Plus
Homo sapiens	4	103883293	103884487	Plus
Homo sapiens	5	15450812	15451942	Plus
Homo sapiens	5	77080703	77081832	Plus
Homo sapiens	5	79595497	79598674	Minus
Homo sapiens	5	97674440	97675536	Plus
Homo sapiens	5	130994866	130995813	Minus
Homo sapiens	6	46172715	46173870	Plus
Homo sapiens	6	88985601	88986651	Minus
Homo sapiens	6	101878287	101878799	Minus
Homo sapiens	8	85860818	85861919	Plus
Homo sapiens	9	6834448	6835584	Plus
Homo sapiens	9	103493514	103494637	Plus
Homo sapiens	10	38989728	38990932	Plus
Homo sapiens	10	64583623	64674116	Plus
Homo sapiens	10	70782546	70783628	Plus
Homo sapiens	11	1824119	1825333	Minus
Homo sapiens	11	71093647	71118830	Minus
Homo sapiens	14	19584595	19585925	Plus
Homo sapiens	14	19987711	19989041	Minus
Homo sapiens	14	22053413	22054550	Minus
Homo sapiens	15	34665735	34666797	Minus
Homo sapiens	15	44281252	44282390	Minus
Homo sapiens	15	83395026	83396177	Minus
Homo sapiens	16	32390389	32391582	Minus
Homo sapiens	16	50092061	50092641	Minus
Homo sapiens	16	50092644	50093142	Minus
Homo sapiens	17	17145334	17146247	Plus
Homo sapiens	18	60109234	60110362	Plus
Homo sapiens	19	9628826	9637989	Plus
Homo sapiens	19	20368529	20370227	Plus
Homo sapiens	20	1141228	1142340	Plus
Homo sapiens	22	16255352	16256679	Minus
Homo sapiens	22	16967583	16968785	Plus
Homo sapiens	22	25082890	25084058	Plus
Homo sapiens	22	41470168	41471251	Minus
Homo sapiens	X	2855939	2857028	Minus
Homo sapiens	X	46147439	46148568	Minus
Homo sapiens	X	53171999	53173095	Minus
Homo sapiens	X	67991165	67992424	Plus
Homo sapiens	X	127261063	127262190	Minus
Homo sapiens	Y	13551549	13552751	Plus
Homo sapiens	Y	19868841	19870002	Minus
Homo sapiens	Y	20309773	20310934	Plus
Macaca mulatta	1	30000399	30000856	Plus
Macaca mulatta	1	80621951	80622950	Minus
Macaca mulatta	1	106545563	106546687	Plus
Macaca mulatta	1	167627052	167628031	Minus
Macaca mulatta	1	219116627	219117397	Minus
Macaca mulatta	2	21346084	21346969	Plus
Macaca mulatta	2	49001177	49002255	Minus
Macaca mulatta	2	105925611	105926610	Minus
Macaca mulatta	2	110835648	110836533	Plus
Macaca mulatta	2	148329518	148330640	Minus
Macaca mulatta	4	46053217	46054336	Plus
Macaca mulatta	4	84207586	84208545	Minus
Macaca mulatta	4	97377217	97378122	Minus
Macaca mulatta	6	15645921	15646991	Plus
Macaca mulatta	6	59548565	59549657	Minus
Macaca mulatta	6	94590231	94591333	Plus
Macaca mulatta	6	128081350	128082466	Minus
Macaca mulatta	7	22386514	22387631	Minus
Macaca mulatta	7	84311372	84312688	Minus
Macaca mulatta	8	87459912	87461006	Plus
Macaca mulatta	10	34433237	34434351	Plus
Macaca mulatta	10	66882678	66884112	Plus
Macaca mulatta	10	67527570	67528735	Plus
Macaca mulatta	10	84994564	84995687	Minus
Macaca mulatta	12	45858593	45859730	Plus
Macaca mulatta	13	57972825	57973958	Plus
Macaca mulatta	13	109900494	109900922	Plus
Macaca mulatta	15	70310913	70312001	Minus
Macaca mulatta	16	17137262	17138131	Plus
Macaca mulatta	18	55815349	55816470	Plus
Macaca mulatta	20	48266485	48267048	Minus
Macaca mulatta	20	48267059	48267531	Minus
Macaca mulatta	X	44125554	44126665	Minus
Macaca mulatta	X	126268203	126269387	Minus
Macaca mulatta	X	126381723	126382916	Minus
Nomascus leucogenys	NW_003501372.1	11776611	11777734	Minus
Nomascus leucogenys	NW_003501377.1	29790155	29791042	Minus
Nomascus leucogenys	NW_003501377.1	34759433	34760441	Plus
Nomascus leucogenys	NW_003501378.1	38098568	38102530	Minus
Nomascus leucogenys	NW_003501382.1	7553488	7643870	Minus
Nomascus leucogenys	NW_003501382.1	22701099	22702126	Minus
Nomascus leucogenys	NW_003501382.1	36432722	36433628	Minus
Nomascus leucogenys	NW_003501386.1	30749322	30750416	Minus
Nomascus leucogenys	NW_003501387.1	10772641	10773637	Minus
Nomascus leucogenys	NW_003501388.1	35357902	35358997	Minus
Nomascus leucogenys	NW_003501388.1	35362938	35363793	Minus
Nomascus leucogenys	NW_003501389.1	807571	808795	Minus
Nomascus leucogenys	NW_003501392.1	10148005	10149129	Plus
Nomascus leucogenys	NW_003501393.1	7545242	7546118	Plus
Nomascus leucogenys	NW_003501395.1	23439668	23441082	Minus
Nomascus leucogenys	NW_003501396.1	10706063	10707148	Plus
Nomascus leucogenys	NW_003501398.1	2357414	2357911	Minus
Nomascus leucogenys	NW_003501399.1	14676355	14677279	Plus
Nomascus leucogenys	NW_003501404.1	8022039	8023143	Plus
Nomascus leucogenys	NW_003501405.1	22896400	22897024	Plus
Nomascus leucogenys	NW_003501406.1	20957438	20958310	Minus
Nomascus leucogenys	NW_003501407.1	19631838	19632974	Plus
Nomascus leucogenys	NW_003501409.1	15765747	15766871	Plus
Nomascus leucogenys	NW_003501415.1	4891098	4892201	Minus
Nomascus leucogenys	NW_003501417.1	7461135	7461938	Plus
Nomascus leucogenys	NW_003501426.1	1865767	1866885	Plus
Nomascus leucogenys	NW_003501433.1	13241605	13242507	Plus
Nomascus leucogenys	NW_003501442.1	10661504	10662615	Minus
Nomascus leucogenys	NW_003501451.1	7187764	7188880	Minus
Nomascus leucogenys	NW_003501457.1	6146389	6147643	Plus
Nomascus leucogenys	NW_003501459.1	3352951	3585454	Minus
Nomascus leucogenys	NW_003501465.1	1792162	1793273	Minus
Nomascus leucogenys	NW_003501483.1	253011	254128	Minus
Nomascus leucogenys	NW_003501490.1	895237	895781	Plus
Nomascus leucogenys	NW_003501502.1	78755	79906	Minus
Nomascus leucogenys	NW_003501502.1	78763	79851	Minus
Nomascus leucogenys	NW_003501519.1	2225386	2226459	Plus
Nomascus leucogenys	NW_003501527.1	2946207	2947309	Minus
Nomascus leucogenys	NW_003501579.1	2052345	2053476	Plus
Nomascus leucogenys	NW_003501583.1	714708	715582	Plus
Pan troglodytes	1	78456747	78457746	Minus
Pan troglodytes	1	104581785	104582906	Plus
Pan troglodytes	1	181667964	181668566	Plus
Pan troglodytes	1	203178627	203179722	Minus
Pan troglodytes	1	217237542	217238304	Plus
Pan troglodytes	3	12280781	12281922	Plus
Pan troglodytes	3	50660434	50664403	Minus
Pan troglodytes	3	143022124	143023258	Plus
Pan troglodytes	3	179897939	179898825	Minus
Pan troglodytes	3	184785484	184786568	Plus
Pan troglodytes	4	105509733	105510928	Plus
Pan troglodytes	5	15624166	15625251	Plus
Pan troglodytes	5	35186484	35187603	Plus
Pan troglodytes	5	37760224	37761354	Minus
Pan troglodytes	5	98619310	98620412	Plus
Pan troglodytes	6	46860585	46861701	Plus
Pan troglodytes	6	88896499	88897546	Minus
Pan troglodytes	6	102363751	102364263	Minus
Pan troglodytes	8	83065126	83066227	Plus
Pan troglodytes	9	6915251	6916385	Plus
Pan troglodytes	9	99546223	99547346	Plus
Pan troglodytes	10	39351573	39352775	Plus
Pan troglodytes	10	67483536	67484618	Plus
Pan troglodytes	11	1807768	1808983	Minus
Pan troglodytes	14	18438353	18439679	Minus
Pan troglodytes	14	18439961	18440725	Minus
Pan troglodytes	14	20480412	20481549	Minus
Pan troglodytes	15	31179356	31180374	Minus
Pan troglodytes	15	41108751	41109881	Minus
Pan troglodytes	16	32618747	32619944	Minus
Pan troglodytes	16	49037037	49037606	Minus
Pan troglodytes	16	49037609	49038090	Minus
Pan troglodytes	17	38714460	38715333	Minus
Pan troglodytes	18	58544666	58545791	Plus
Pan troglodytes	19	20586762	20588464	Plus
Pan troglodytes	20	1069931	1071415	Plus
Pan troglodytes	22	23209937	23211104	Plus
Pan troglodytes	22	39792835	39793919	Minus
Pan troglodytes	2A	58622385	58623490	Plus
Pan troglodytes	2A	110593440	110594565	Plus
Pan troglodytes	2B	132240507	132241837	Plus
Pan troglodytes	X	46785542	46786664	Minus
Pan troglodytes	X	53817227	53818134	Minus
Pan troglodytes	X	68500970	68502096	Plus
Pan troglodytes	X	128721974	128723100	Minus
Pan troglodytes	Y	244835	246032	Plus
Pan troglodytes	Y	894521	895624	Plus
Pan troglodytes	Y	4846412	4847515	Minus
Pan troglodytes	Y	5262180	5263283	Plus
Pan troglodytes	Y	13492118	13493221	Minus
Pan troglodytes	Y	13882625	13883728	Plus
Pongo pygmaeus abelii	1	11481108	11481874	Minus
Pongo pygmaeus abelii	1	25739350	25740479	Plus
Pongo pygmaeus abelii	1	47427439	47428037	Minus
Pongo pygmaeus abelii	1	124878295	124879175	Minus
Pongo pygmaeus abelii	1	136589694	136590158	Plus
Pongo pygmaeus abelii	1	151349947	151350948	Plus
Pongo pygmaeus abelii	1	203026021	203026491	Minus
Pongo pygmaeus abelii	3	32003969	32004875	Minus
Pongo pygmaeus abelii	3	57895919	57897055	Minus
Pongo pygmaeus abelii	3	142016651	142017774	Plus
Pongo pygmaeus abelii	3	173320407	173330604	Minus
Pongo pygmaeus abelii	3	179455764	179456640	Minus
Pongo pygmaeus abelii	3	184533447	184534446	Plus
Pongo pygmaeus abelii	4	107423545	107424737	Plus
Pongo pygmaeus abelii	5	16295353	16296470	Plus
Pongo pygmaeus abelii	5	63316760	63317789	Minus
Pongo pygmaeus abelii	5	80473971	80474458	Plus
Pongo pygmaeus abelii	5	80477385	80478497	Minus
Pongo pygmaeus abelii	5	99020100	99021187	Plus
Pongo pygmaeus abelii	5	133114811	133115834	Minus
Pongo pygmaeus abelii	5	133114937	133115864	Plus
Pongo pygmaeus abelii	6	359432	360546	Minus
Pongo pygmaeus abelii	6	31134132	31135247	Minus
Pongo pygmaeus abelii	6	46197791	46198930	Plus
Pongo pygmaeus abelii	6	89210762	89211804	Minus
Pongo pygmaeus abelii	6	102957877	102958787	Minus
Pongo pygmaeus abelii	9	55970804	55971931	Minus
Pongo pygmaeus abelii	9	96572622	96573738	Plus
Pongo pygmaeus abelii	10	66478045	66479125	Minus
Pongo pygmaeus abelii	11	1642836	1644027	Minus
Pongo pygmaeus abelii	13	62491138	62491605	Minus
Pongo pygmaeus abelii	14	18611766	18612884	Plus
Pongo pygmaeus abelii	14	20980820	20982210	Minus
Pongo pygmaeus abelii	15	30443952	30444953	Minus
Pongo pygmaeus abelii	15	40450471	40451594	Minus
Pongo pygmaeus abelii	15	80162094	80163210	Minus
Pongo pygmaeus abelii	16	37073548	37074599	Minus
Pongo pygmaeus abelii	17	17593683	17594541	Plus
Pongo pygmaeus abelii	18	75255753	75256872	Plus
Pongo pygmaeus abelii	20	27232826	27233939	Minus
Pongo pygmaeus abelii	22	36327830	36328899	Minus
Pongo pygmaeus abelii	2A	18476600	18477705	Plus
Pongo pygmaeus abelii	2A	53226029	53226611	Minus
Pongo pygmaeus abelii	2A	53229962	53231063	Minus
Pongo pygmaeus abelii	X	47044994	47046109	Minus
Pongo pygmaeus abelii	X	53529305	53530394	Minus
Pongo pygmaeus abelii	X	66406753	66408013	Plus
Pongo pygmaeus abelii	X	127525769	127526370	Minus

## Sheet: TableS4
Supplemental table4. The coefficient of variation of the expression level values for actin genes within species and within different groups in all the five tissues.
Tissue	Group/Species name	CV value
Brain	Complex group2	0.088217
Brain	Complex group15	0.063678
Brain	Complex group16	0.146684
Brain	Complex group17	0.00450041
Brain	Complex group18	0.140944
Brain	Complex group19	0.295558
Brain	Orthologous group3	0.0552074
Brain	Orthologous group9	0.663758
Brain	Orthologous group10	0.239102
Brain	Orthologous group11	0.0644114
Brain	Orthologous group12	0.27178
Brain	Orthologous group13	0.0802134
Brain	Orthologous group14	0.27793
Brain	Human	1.55361
Brain	Chimpanzee	1.79031
Heart	Complex group2	0.160604
Heart	Complex group15	0.20061
Heart	Complex group16	0.00114727
Heart	Complex group17	0.158774
Heart	Complex group18	0.190899
Heart	Complex group19	0.122473
Heart	Orthologous group2	0.123311
Heart	Orthologous group3	0.0590767
Heart	Orthologous group9	0.242959
Heart	Orthologous group10	0.0228589
Heart	Orthologous group11	0.308625
Heart	Orthologous group12	0.253942
Heart	Orthologous group14	0.361718
Heart	Human	1.54195
Heart	Chimpanzee	1.61365
Kidney	Complex group2	0.0521583
Kidney	Complex group15	0.107428
Kidney	Complex group16	0.0619893
Kidney	Complex group17	0.433396
Kidney	Complex group18	0.169713
Kidney	Orthologous group3	0.183521
Kidney	Orthologous group9	0.211854
Kidney	Orthologous group10	0.0998433
Kidney	Orthologous group11	0.39737
Kidney	Orthologous group12	0.0986251
Kidney	Orthologous group14	0.111236
Kidney	Human	1.59287
Kidney	Chimpanzee	1.80461
Liver	Complex group2	0.0855226
Liver	Complex group9	0.203516
Liver	Complex group15	0.1773
Liver	Complex group16	0.147705
Liver	Complex group17	0.0273114
Liver	Complex group18	0.144583
Liver	Complex group19	0.102193
Liver	Orthologous group9	0.199715
Liver	Orthologous group10	0.0890236
Liver	Orthologous group11	0.378445
Liver	Orthologous group12	0.00844711
Liver	Orthologous group14	0.00609609
Liver	Human	1.7432
Liver	Chimpanzee	2.15833
Testis	Complex group2	0.337164
Testis	Complex group9	0.00164186
Testis	Complex group11	0.226148
Testis	Complex group12	0.381247
Testis	Complex group13	0.214286
Testis	Complex group15	0.217457
Testis	Complex group16	0.0487946
Testis	Complex group17	0.198053
Testis	Complex group18	0.30206
Testis	Complex group19	0.332847
Testis	Orthologous group3	0.962775
Testis	Orthologous group7	0.209959
Testis	Orthologous group8	0.0916515
Testis	Orthologous group9	0.191311
Testis	Orthologous group10	0.261326
Testis	Orthologous group11	0.129822
Testis	Orthologous group12	0.222997
Testis	Orthologous group14	0.0778787
Testis	Human	1.14315
Testis	Chimpanzee	0.87517

## Sheet: TableS5
Supplemental table5. Expression level of actin genes from human and chimpanzee genomes in all the five tissues.
Species	Gene name	Brain	Heart	Kidney	Liver	Testis	CV
Human	ACTA2_Hsa	1038.61	2619.54	3676.66	1582.12	4838.82	0.5611
	ACTG1_Hsa	14231	4013.52	11136.2	9494.77	10073.1	0.379016
	ACTB_Hsa	19025.8	6935.51	13155.1	10032.5	9719.43	0.391904
	ACTL6A_Hsa	64.039	219.21	281.966	232.991	1820.32	1.39279
	ACTR10_Hsa	5163.44	1982.54	2330.82	1068.12	2387.99	0.593155
	ACTR1A_Hsa	2280.36	736.376	812.11	615.565	1158.16	0.605996
	ACTR1B_Hsa	1900.11	605.043	1044.66	794.454	632.491	0.537613
	ACTR2_Hsa	2565.28	498.12	846.367	698.49	701.156	0.800001
	ACTR3_Hsa	2567.65	1033.65	1725.79	1053.96	2354.31	0.407954
	ACTR5_Hsa	374.925	139.783	309.659	348.672	529.252	0.410468
	ACTR6_Hsa	846.443	237.377	374.58	159.166	781.824	0.657567
	ACTR8_Hsa	573.943	322.126	405.525	324.352	534.298	0.271341
	Average						0.584076
Chimpanzee	ACTB_Ptr	16791.6	8712.58	14162.6	11324.1	5977.18	0.375809
	ACTL6A_Ptr	43.0025	129.913	330.109	230.991	1630.3	1.38713
	ACTR10_Ptr	3669.97	1919.47	2023.41	941.61	1643.1	0.492489
	ACTR1A_Ptr	1851.77	737.572	886.569	759.144	1080.9	0.434047
	ACTR1B_Ptr	1736.37	805.072	1216.41	1022.21	463.903	0.453042
	ACTR2_Ptr	2100.29	653.583	1077.21	568.916	454.352	0.693999
	ACTR3_Ptr	2812.7	1610.74	3074.61	1824.14	2830.24	0.272952
	ACTR5_Ptr	377.319	175.14	583.319	362.405	399.224	0.381854
	ACTR6_Ptr	305.691	167.773	276.975	119.774	595.503	0.632737
	ACTR8_Ptr	388.905	463.13	466.326	328.25	388.749	0.142884
	Average						0.526694
